# Supplementary material
Source: publisher figshare collection journal article supplement (https://acs.figshare.com/ndownloader/files/5539112)
Supplement: Supplementary file 1 [file 5539112]

*SUPPORTING INFORMATION FOR:*

**A Formal Total Synthesis of (±)-Kopsihainanine A Using a Raney-Cobalt Mediated Reductive Cyclization Route to Polyhydroquinolines**

Shen H. Tan, Martin G. Banwell\* and Anthony C. Willis

*Research School of Chemistry, Institute of Advanced Studies, The Australian National University, Canberra, ACT 2601, Australia*

| <b>CONTENTS</b>                                                                                                              | <b>PAGE</b> |
|------------------------------------------------------------------------------------------------------------------------------|-------------|
| Anisotropic Displacement Ellipsoid Plots from the Single-crystal X-ray                                                       |             |
| Analyses of compounds <b>5</b> , <b>6</b> and <b>8</b> .                                                                     | S2          |
| <sup>1</sup> H and <sup>13</sup> C NMR spectra for compounds <b>2</b> , <b>5</b> , <b>6</b> , <b>8-11</b> and <b>13-17</b> . | S5          |

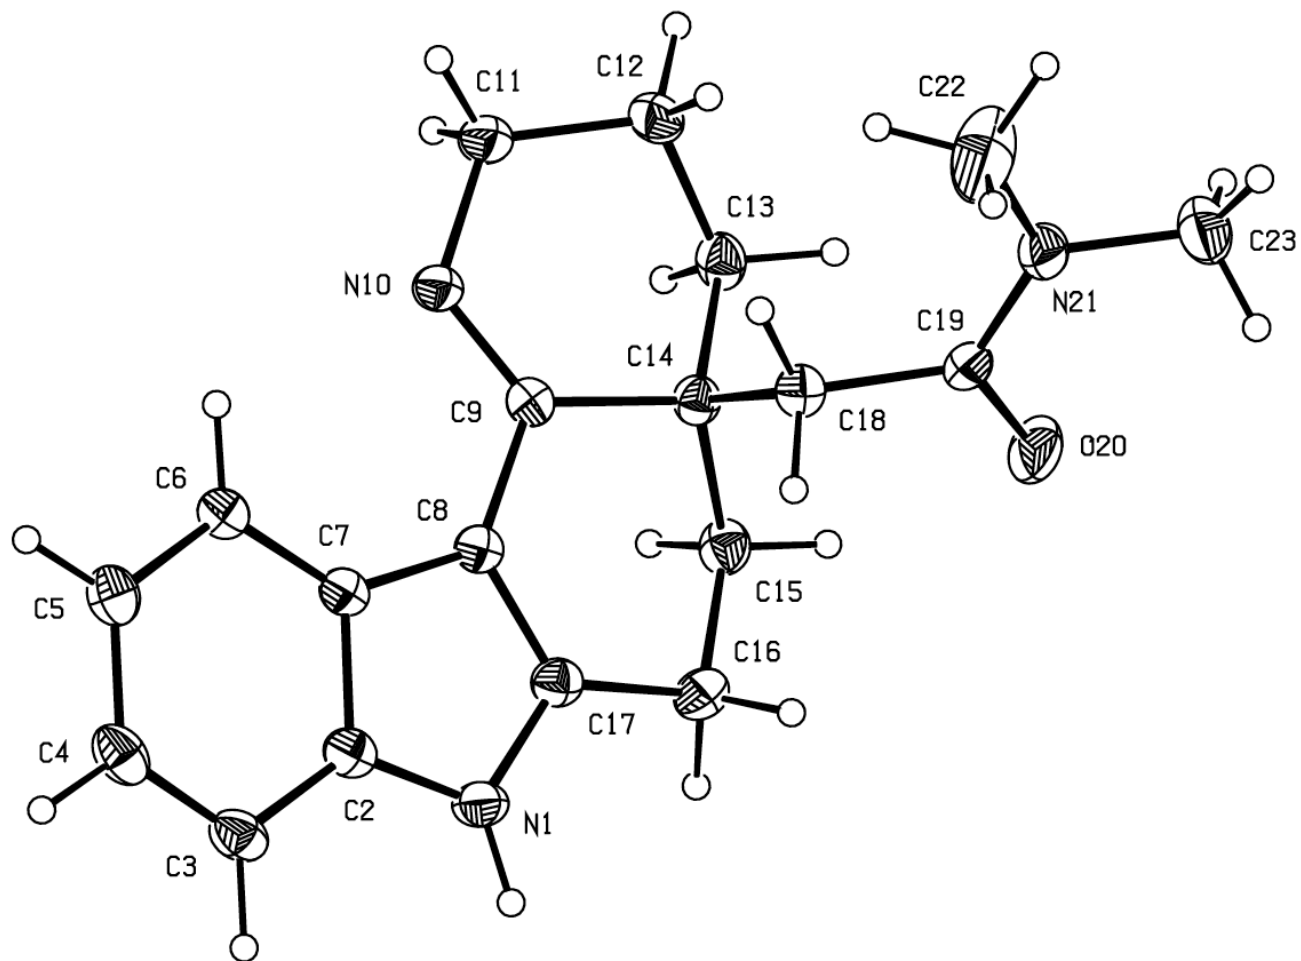

**Figure S1:** Structure of compound **5** (CCDC 1482202) with labeling of selected atoms. Anisotropic displacement ellipsoids show 30% probability levels. Hydrogen atoms are drawn as circles with small radii.

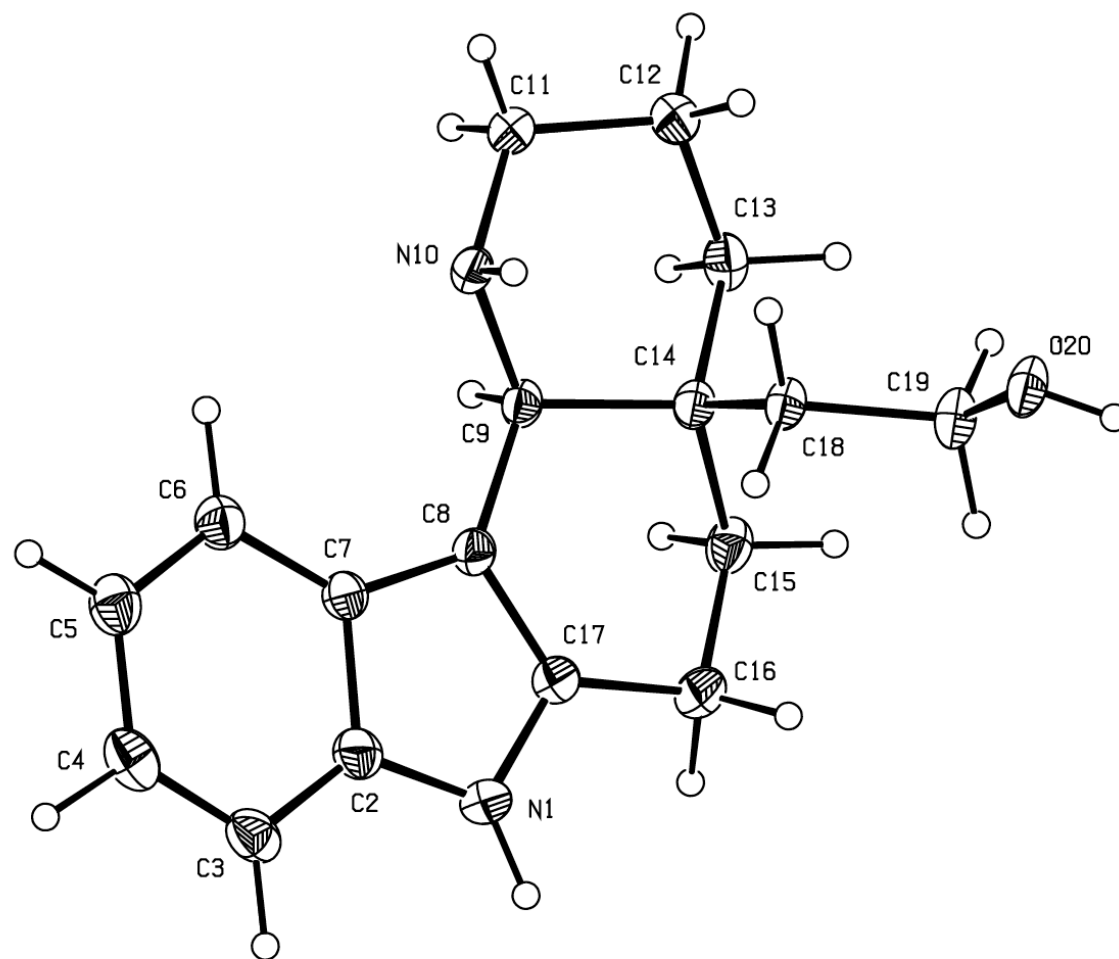

**Figure S2:** Structure of compound **6** (CCDC 1482203) with labeling of selected atoms. Anisotropic displacement ellipsoids show 30% probability levels. Hydrogen atoms are drawn as circles with small radii.

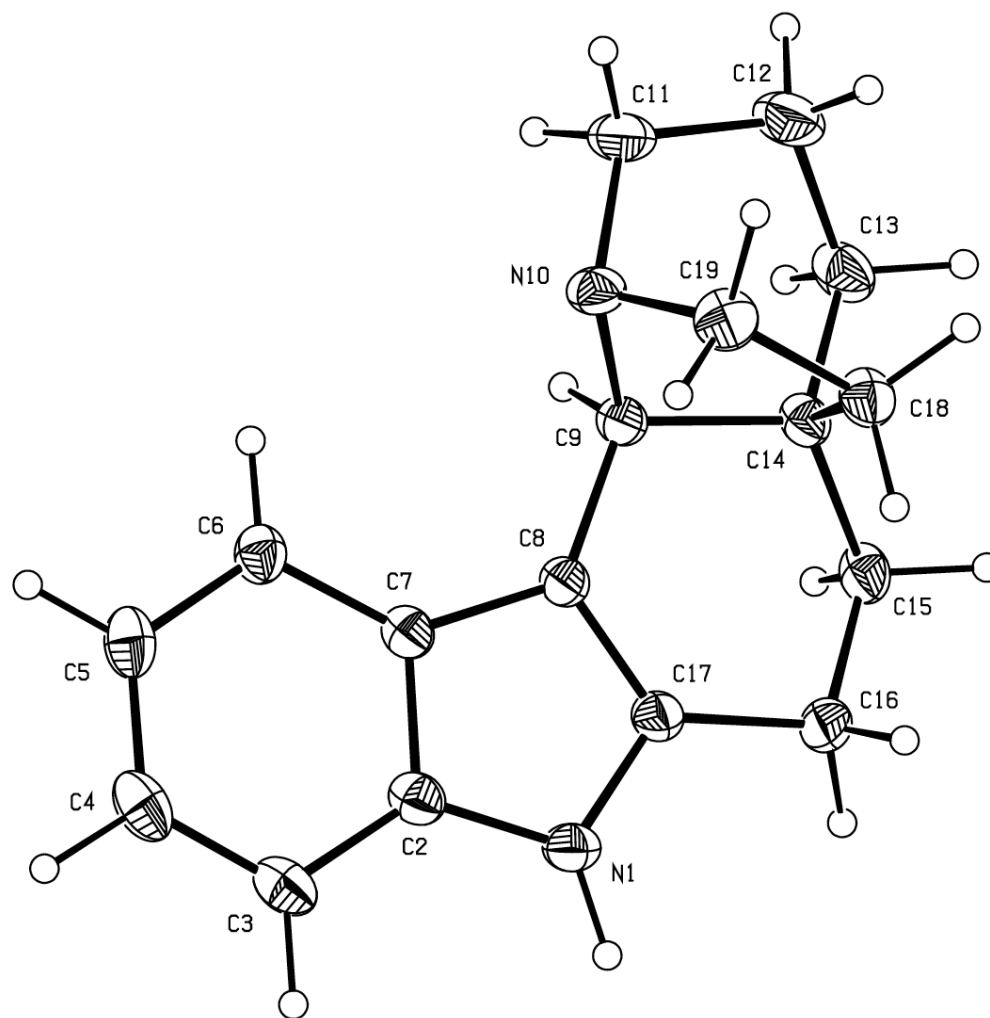

**Figure S3:** Structure of compound **8** (CCDC 1482204) with labeling of selected atoms. Anisotropic displacement ellipsoids show 30% probability levels. Hydrogen atoms are drawn as circles with small radii.

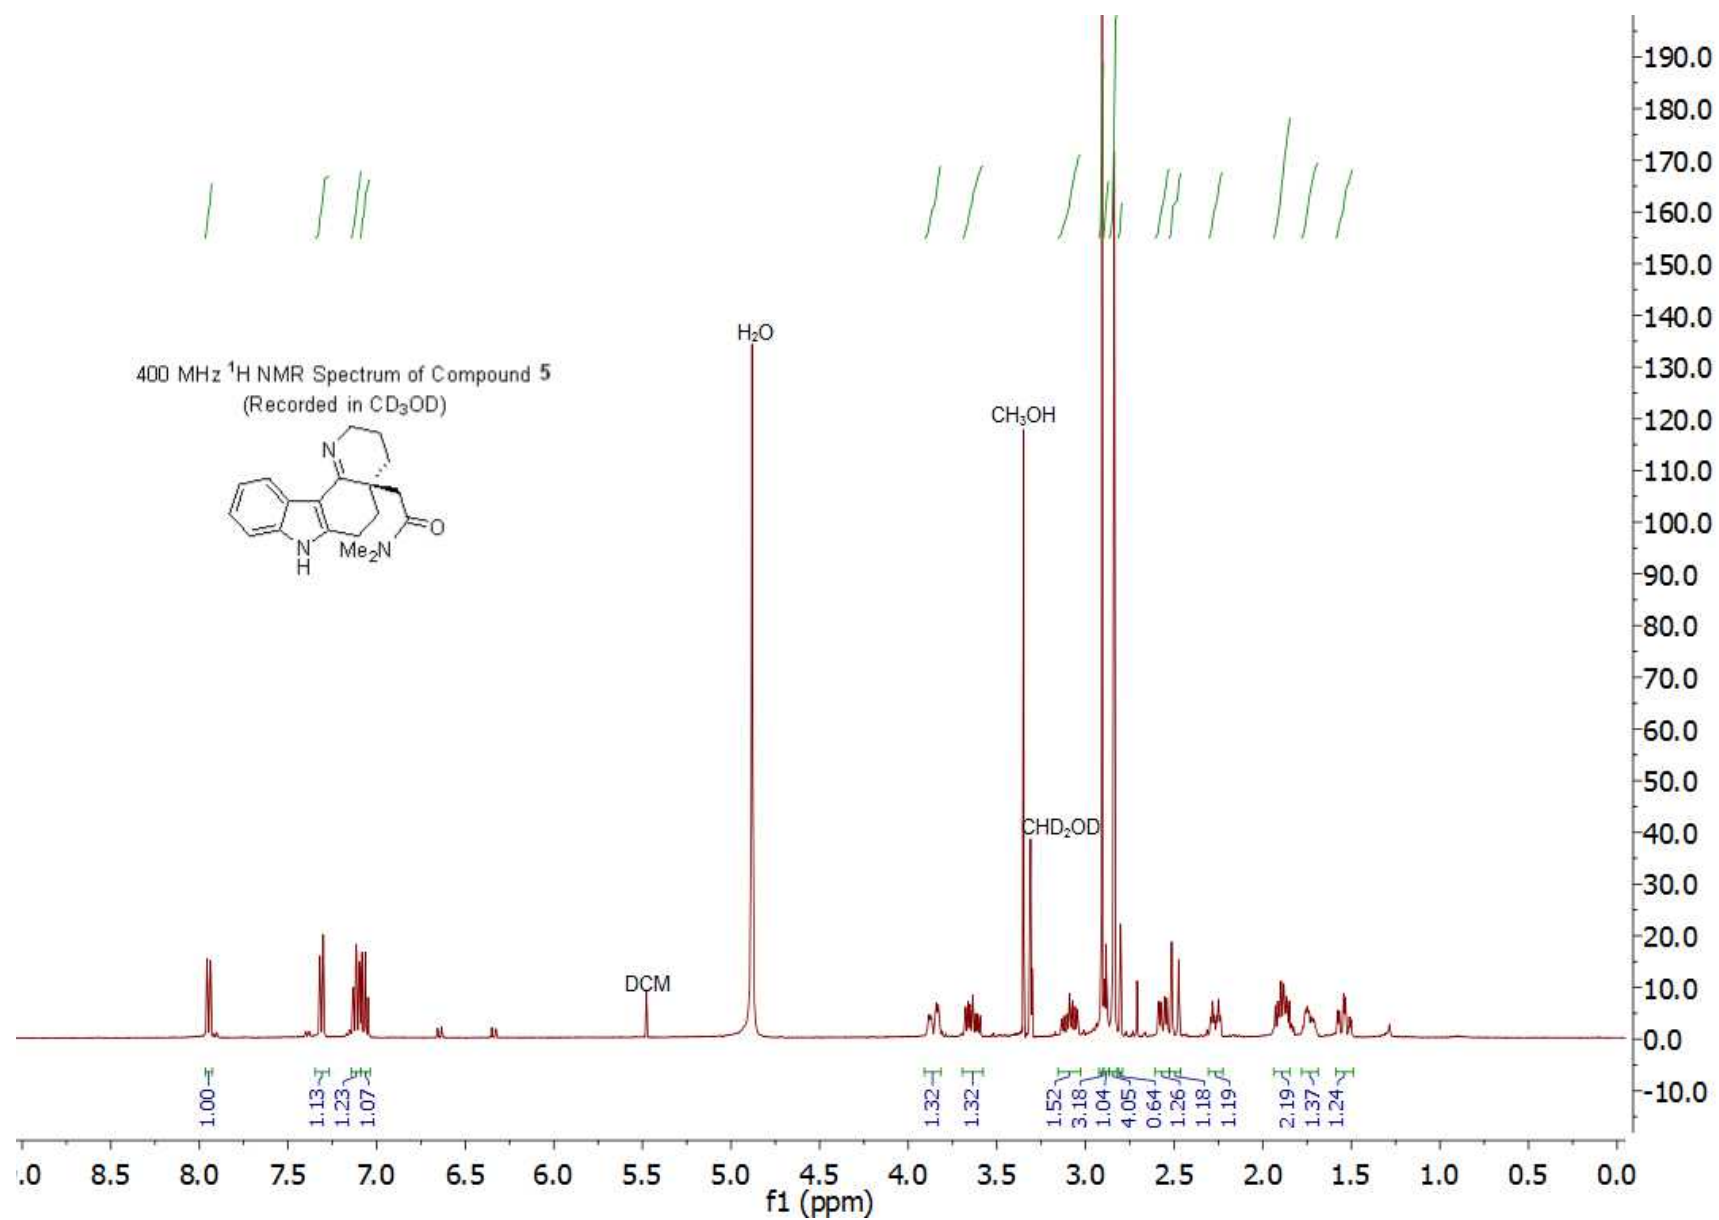

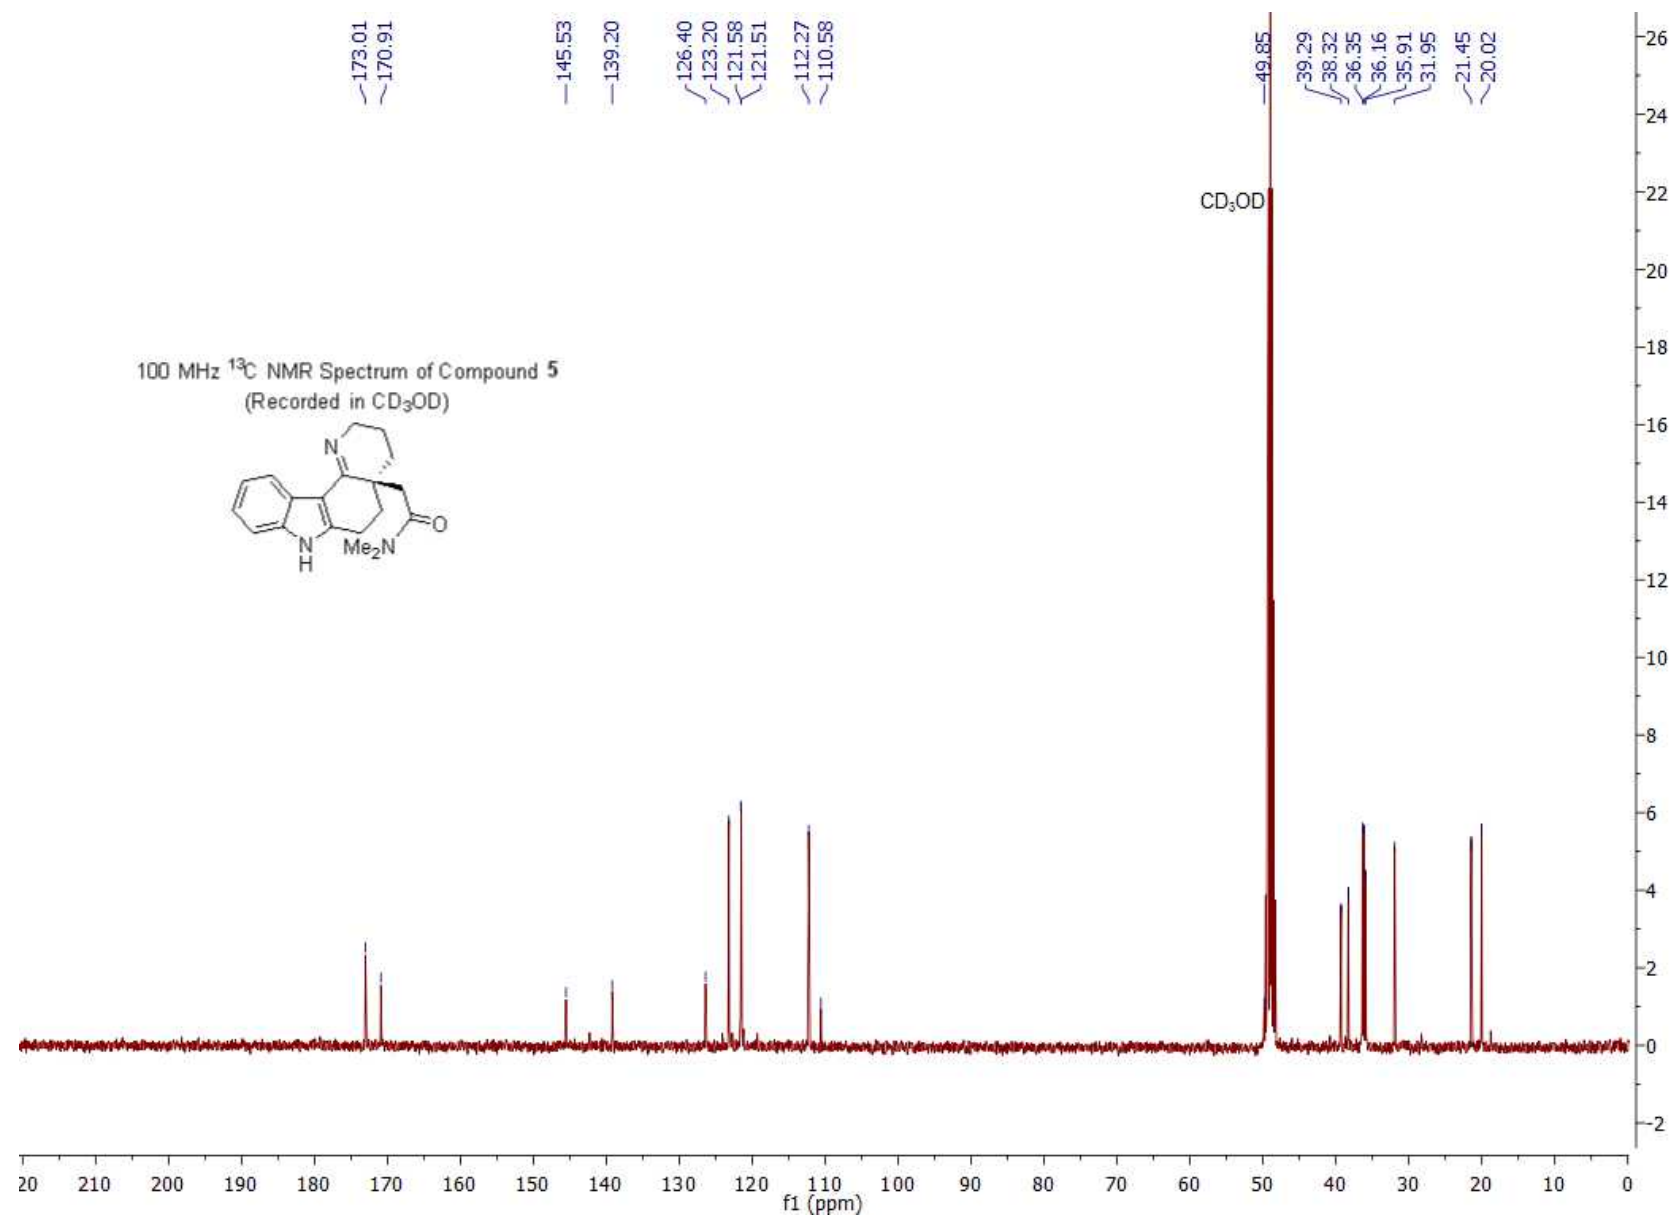

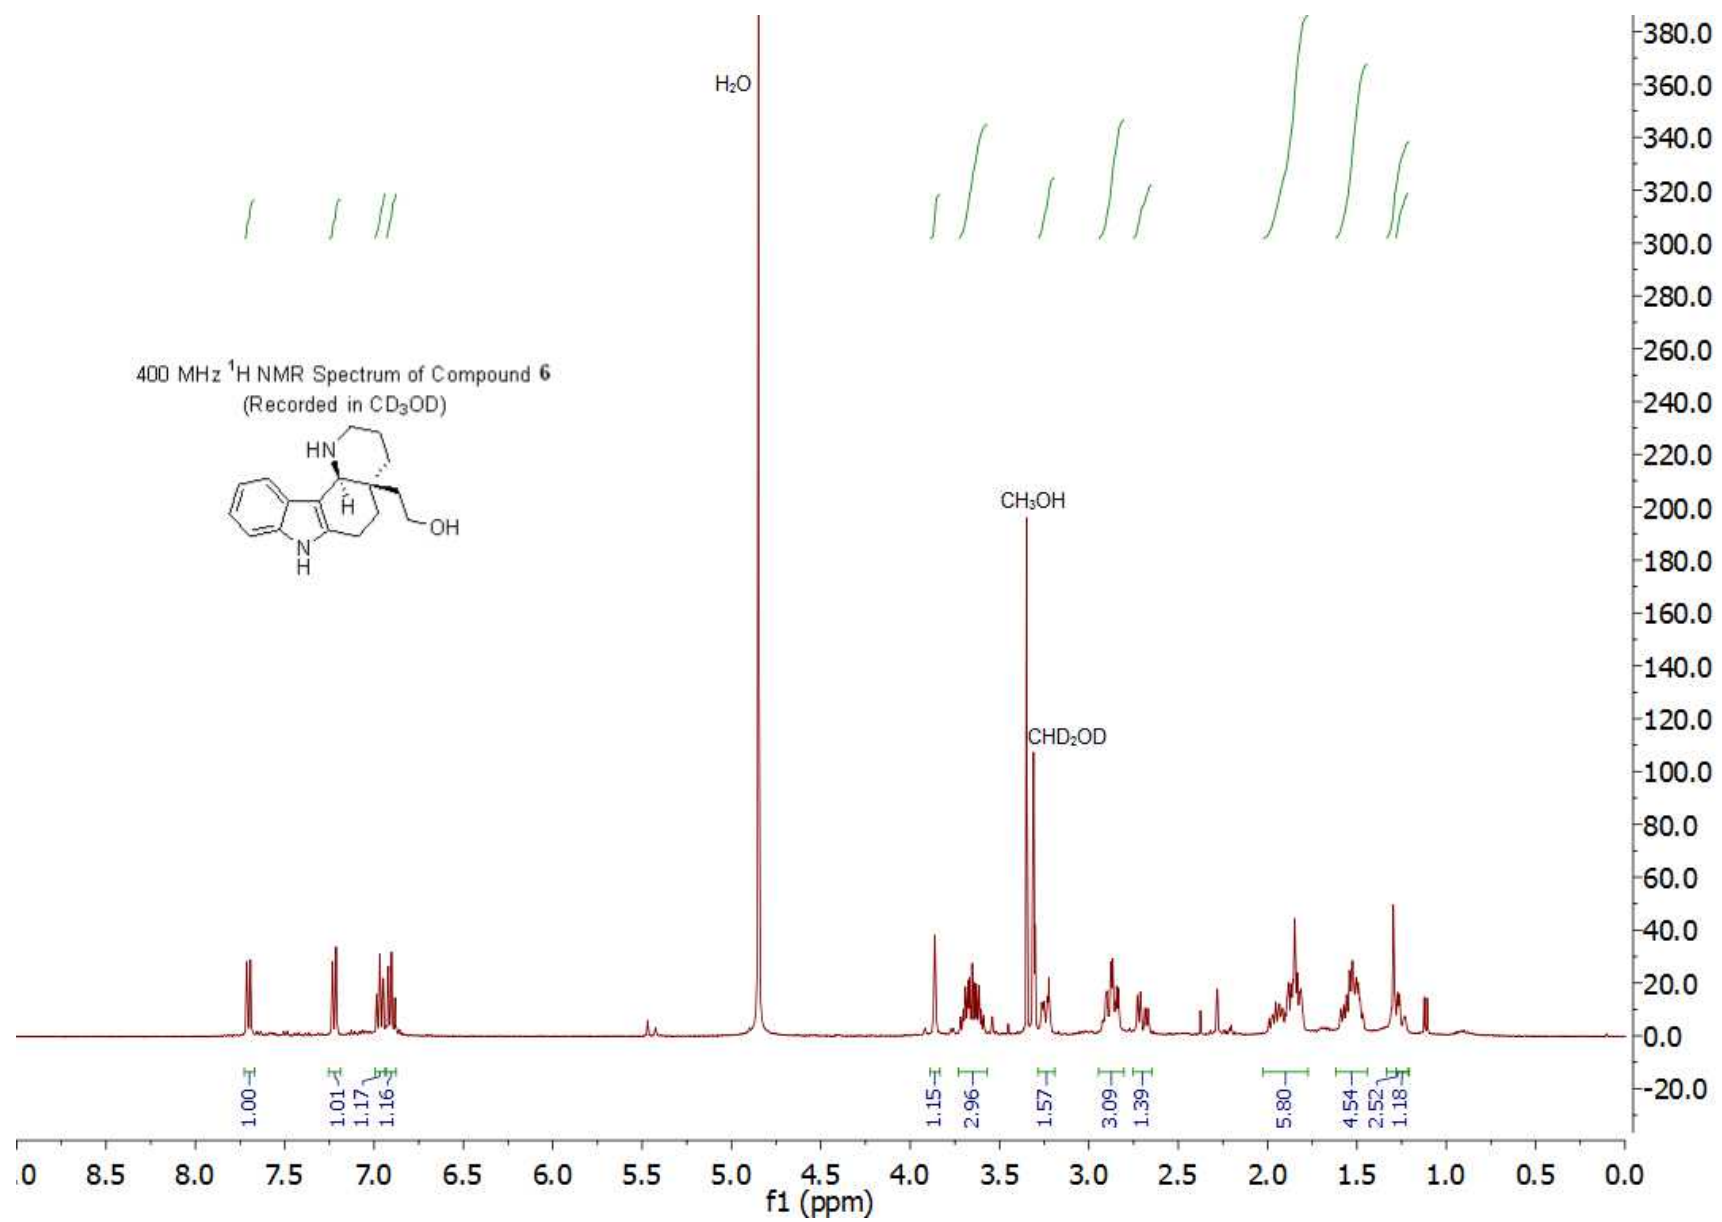

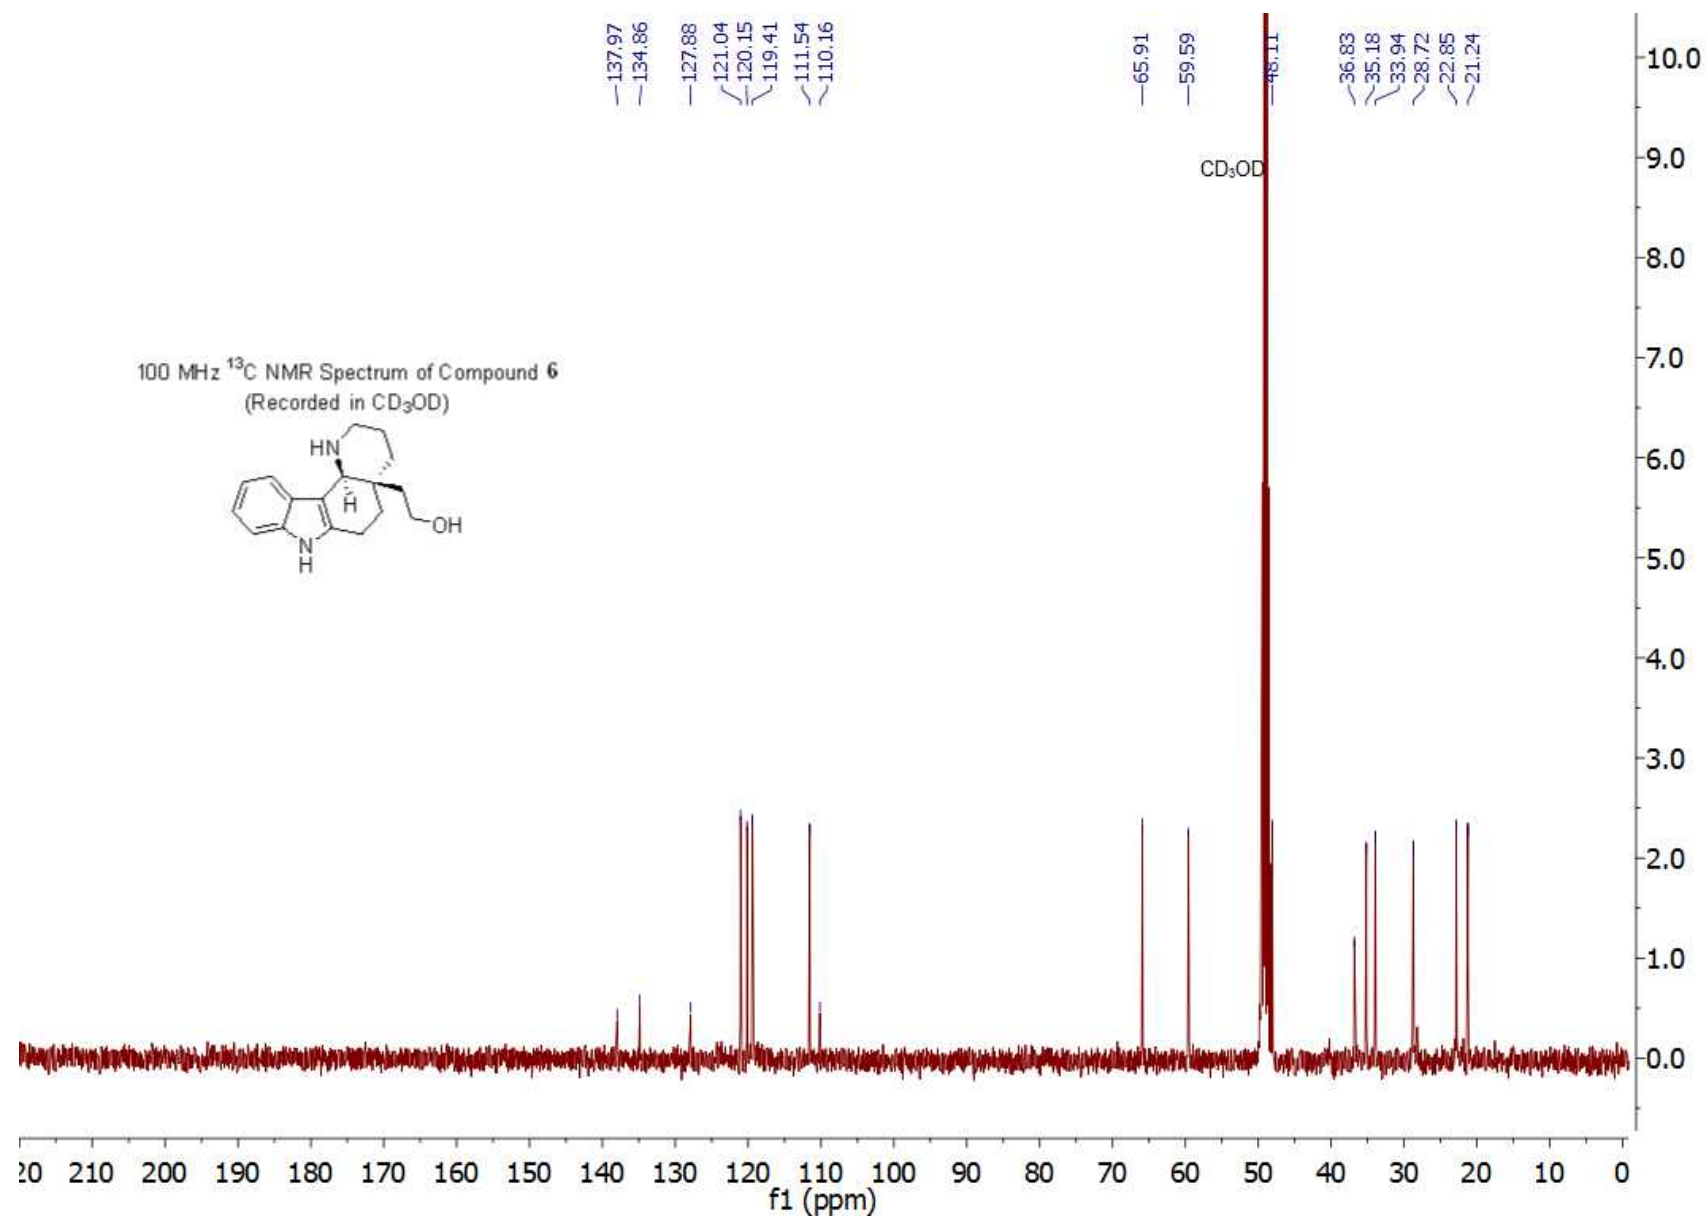



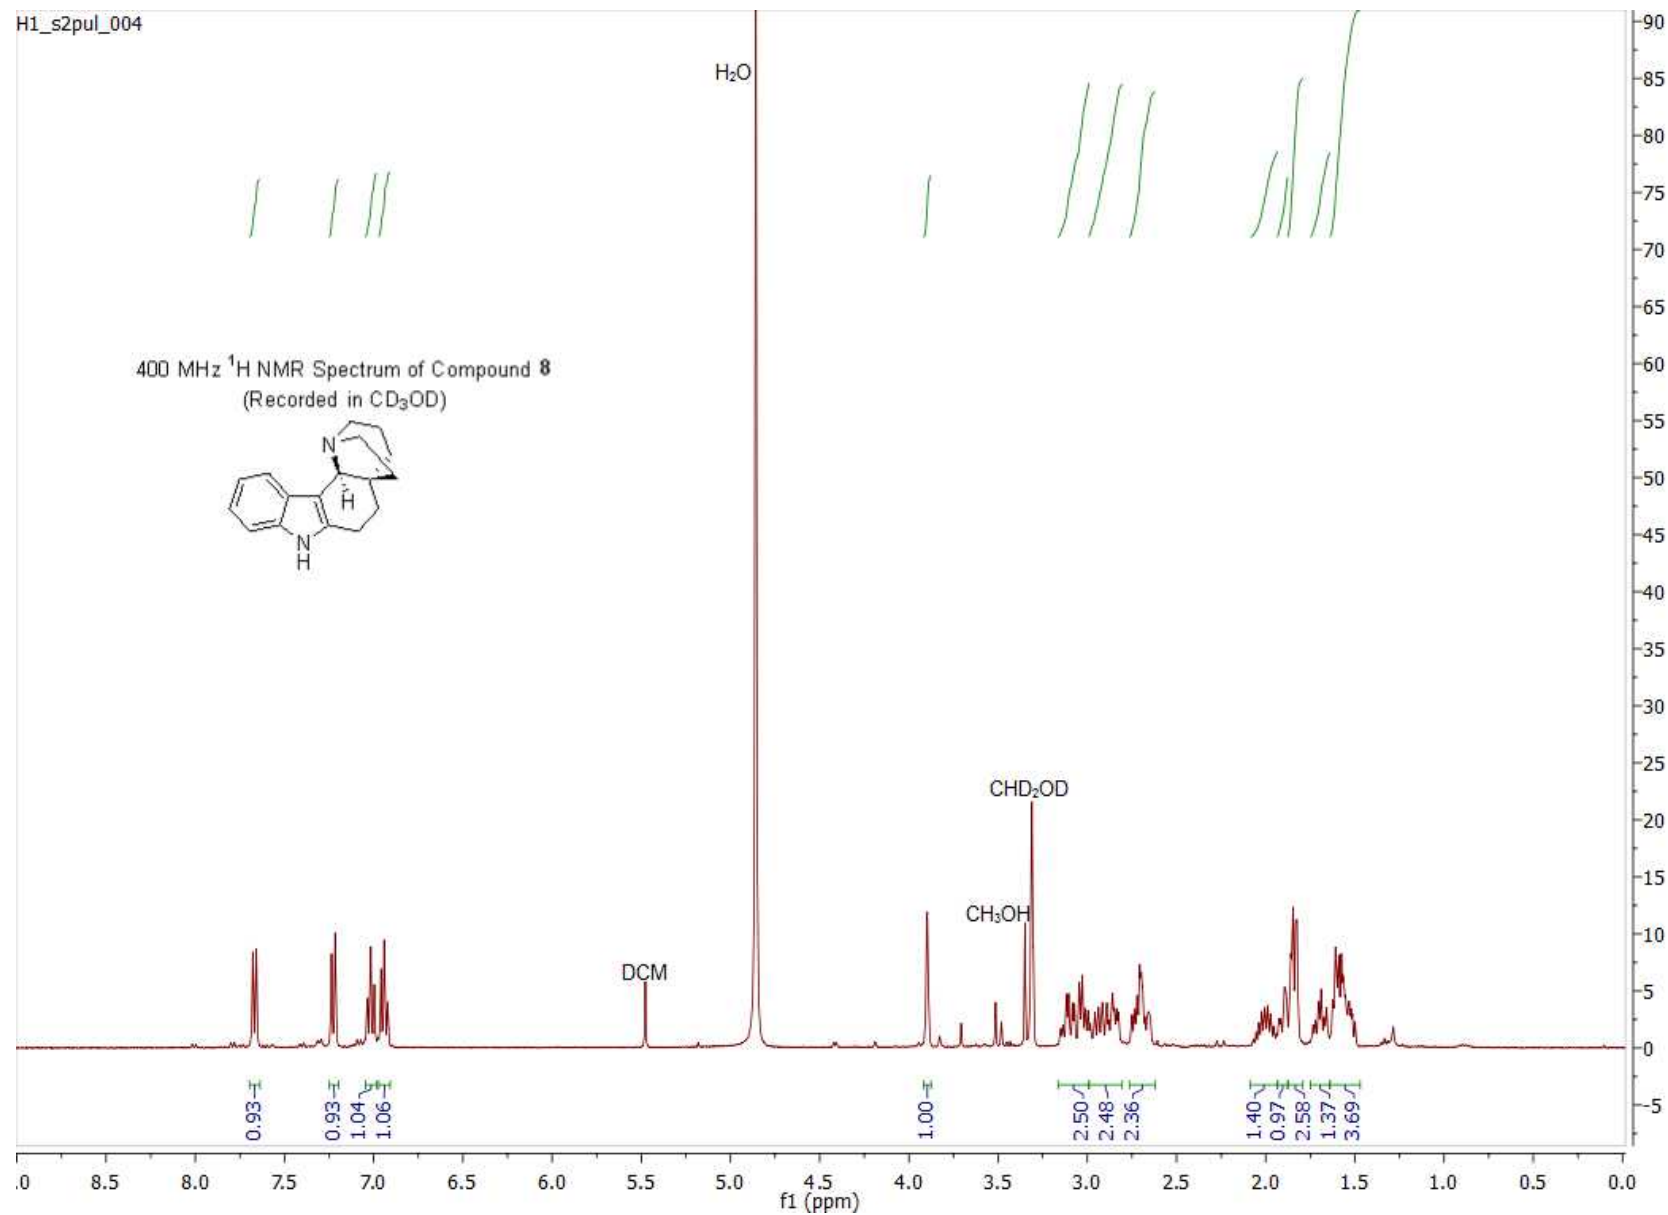

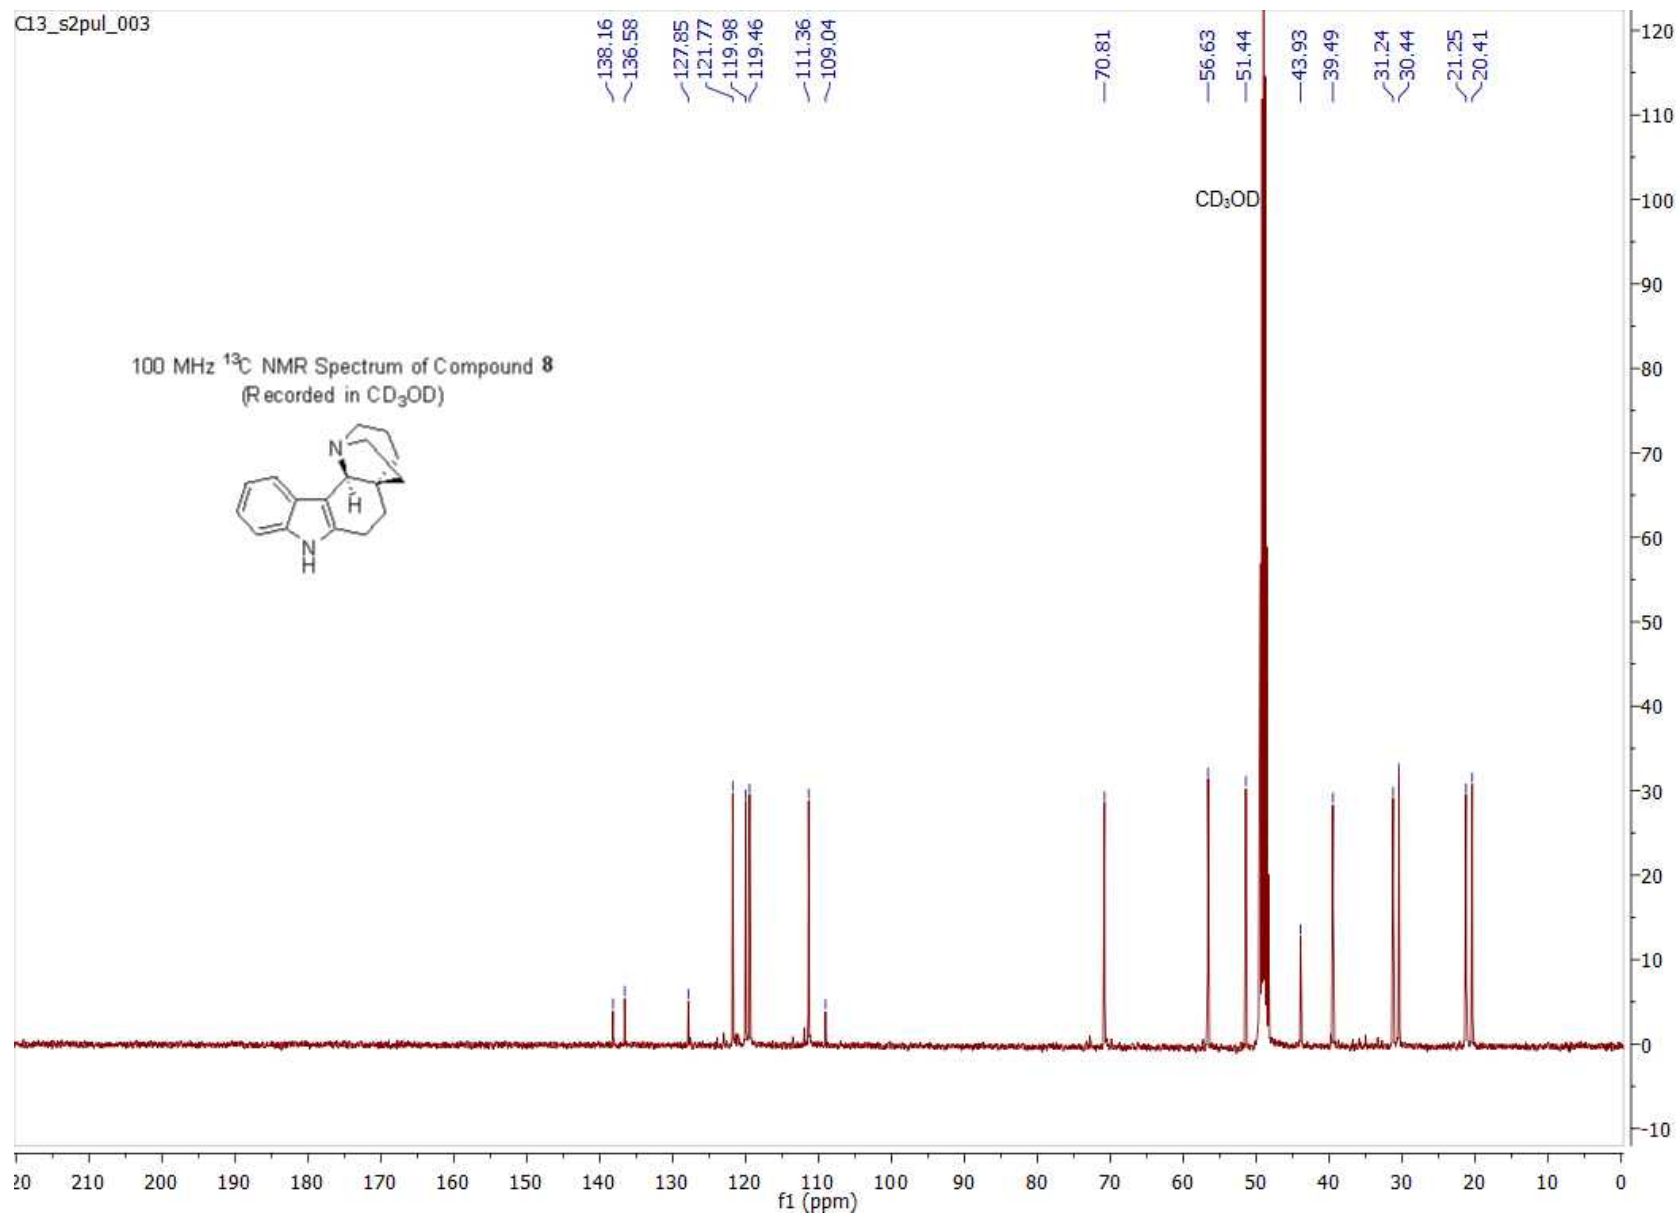

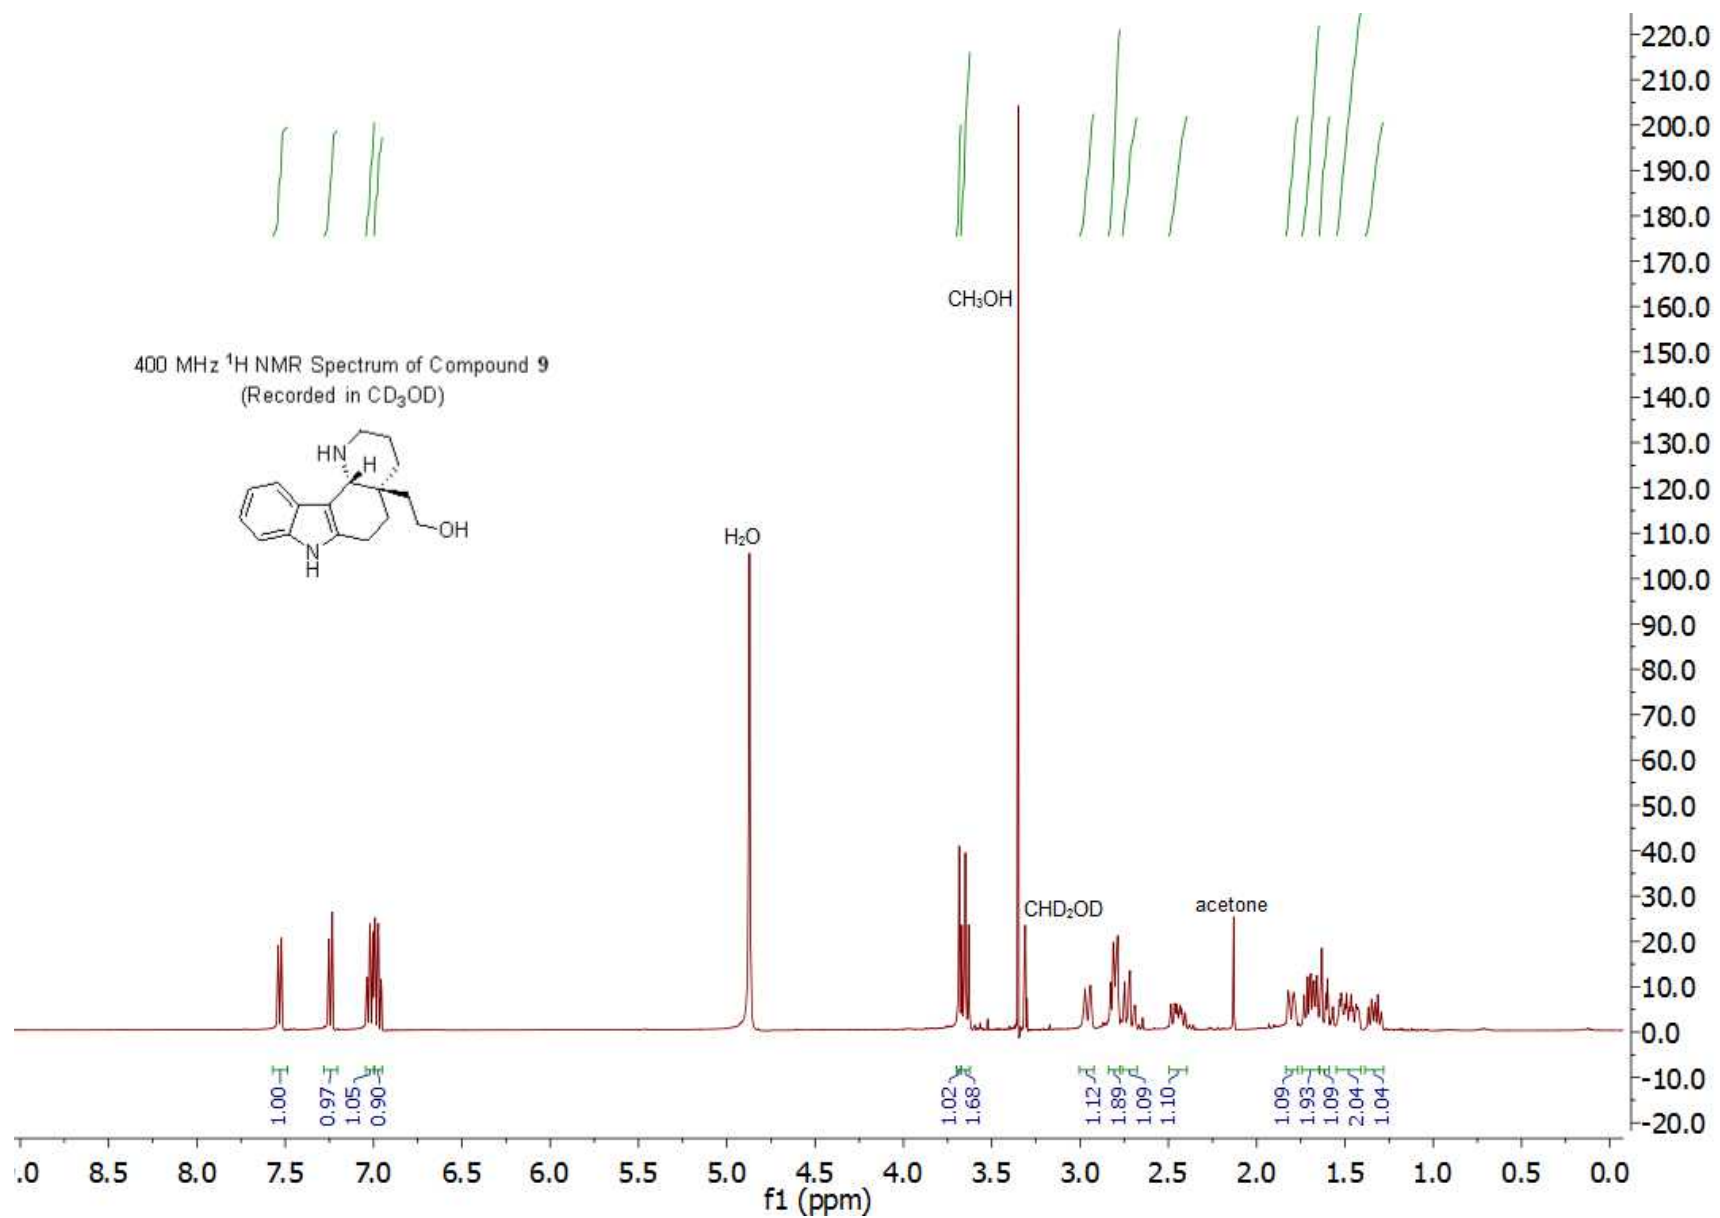

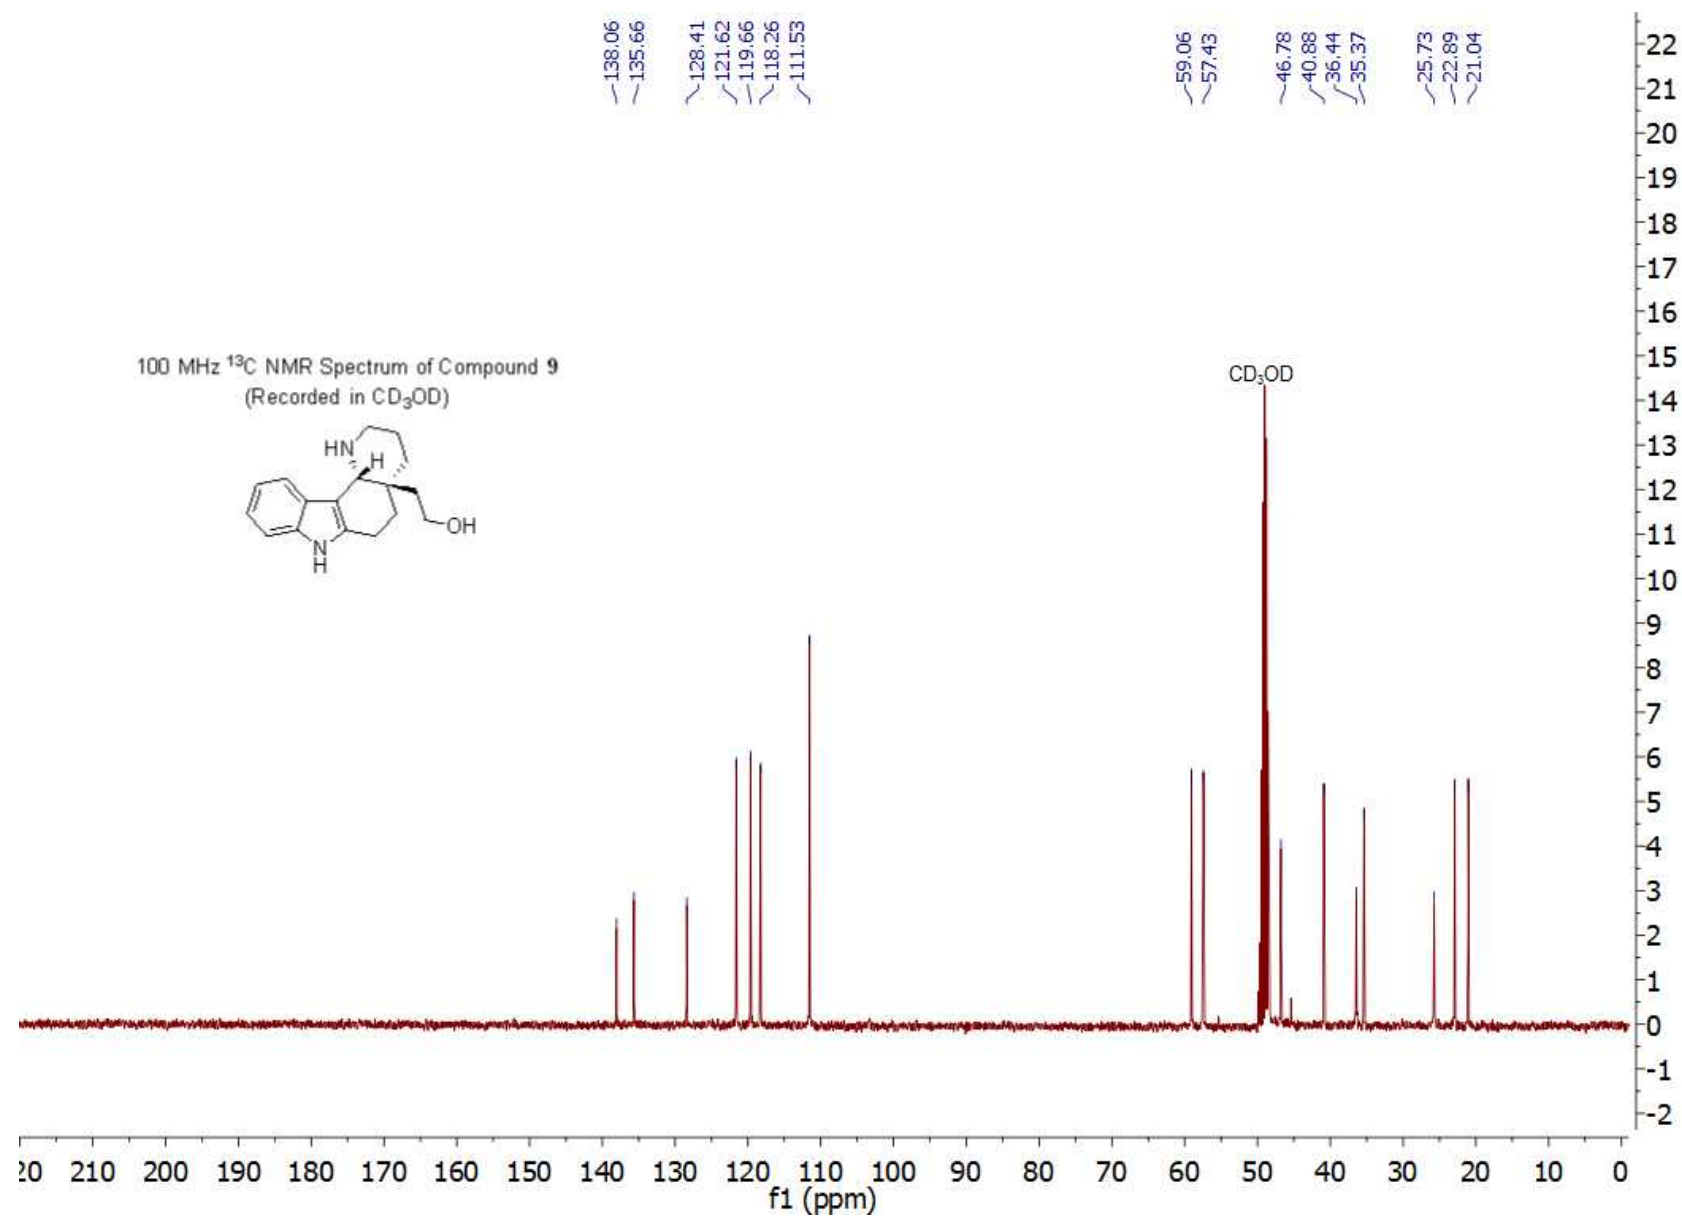

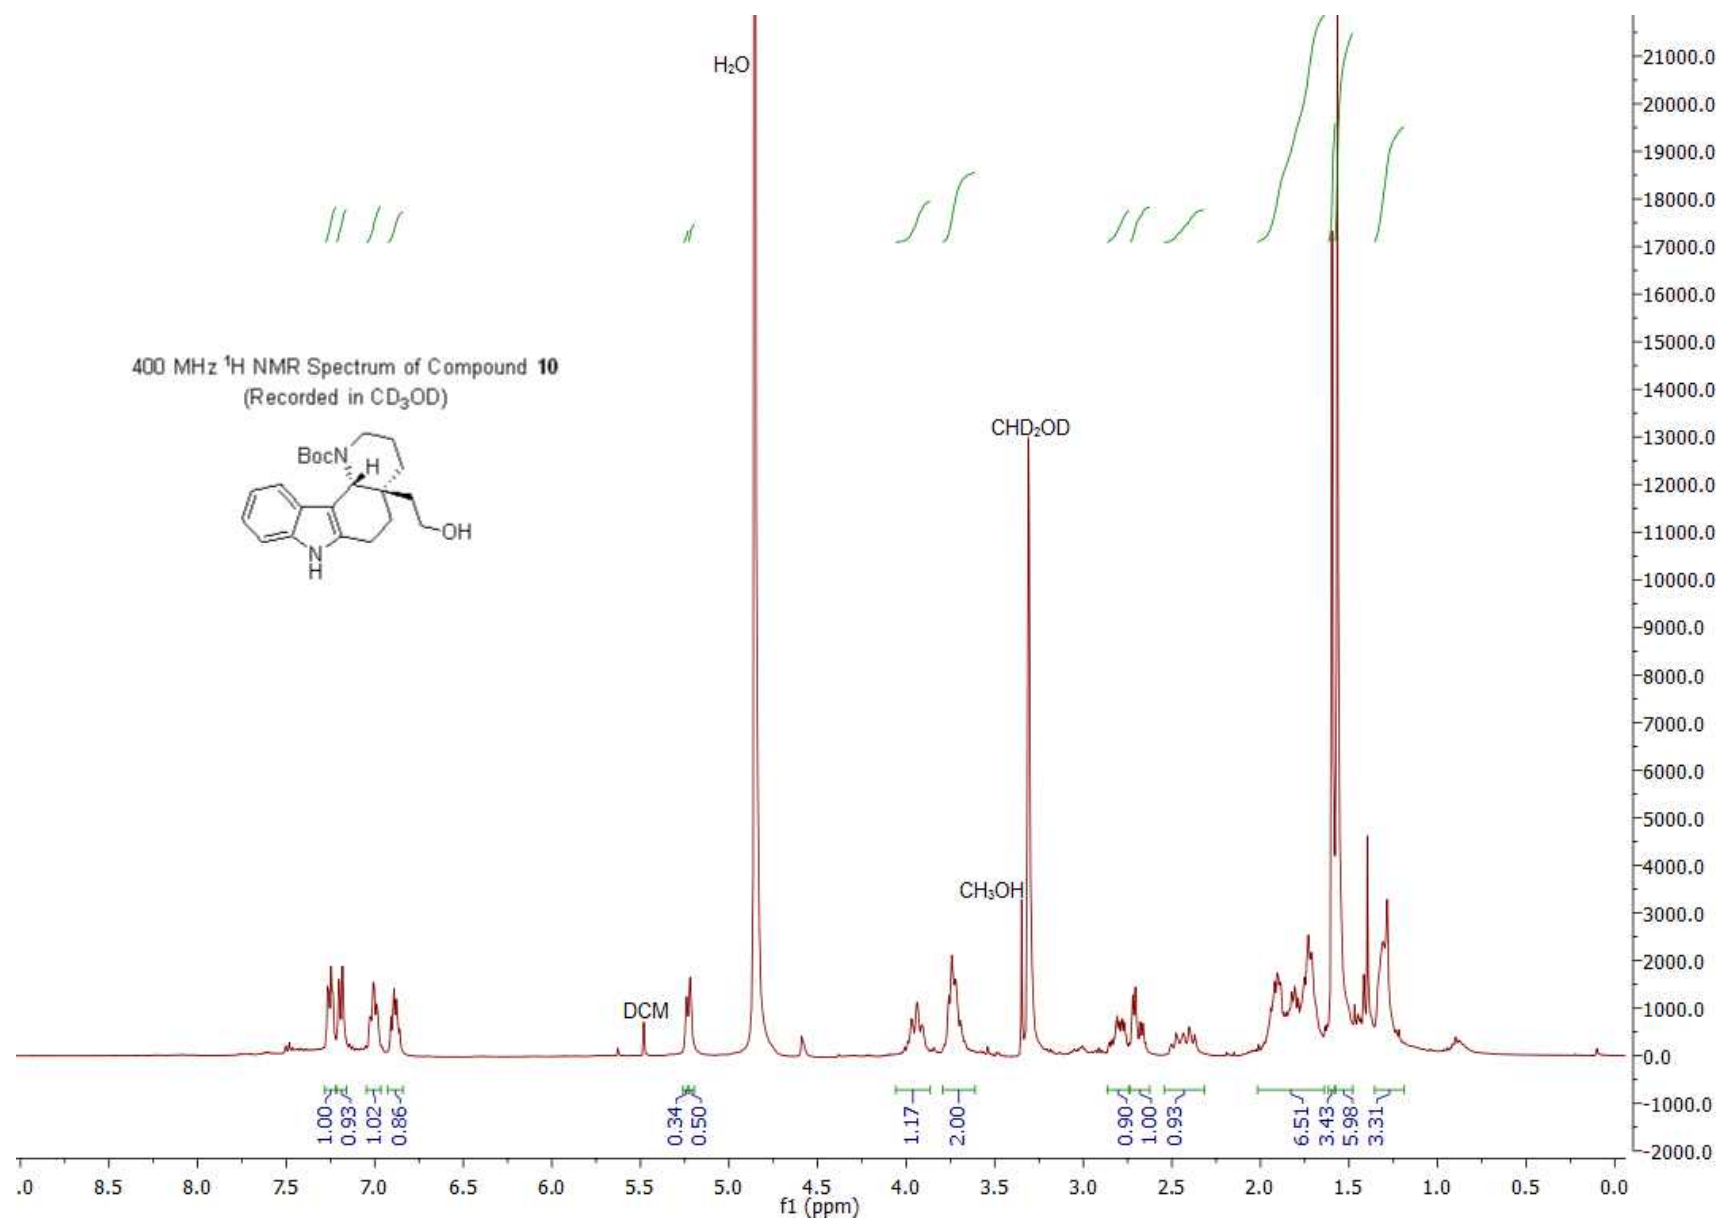

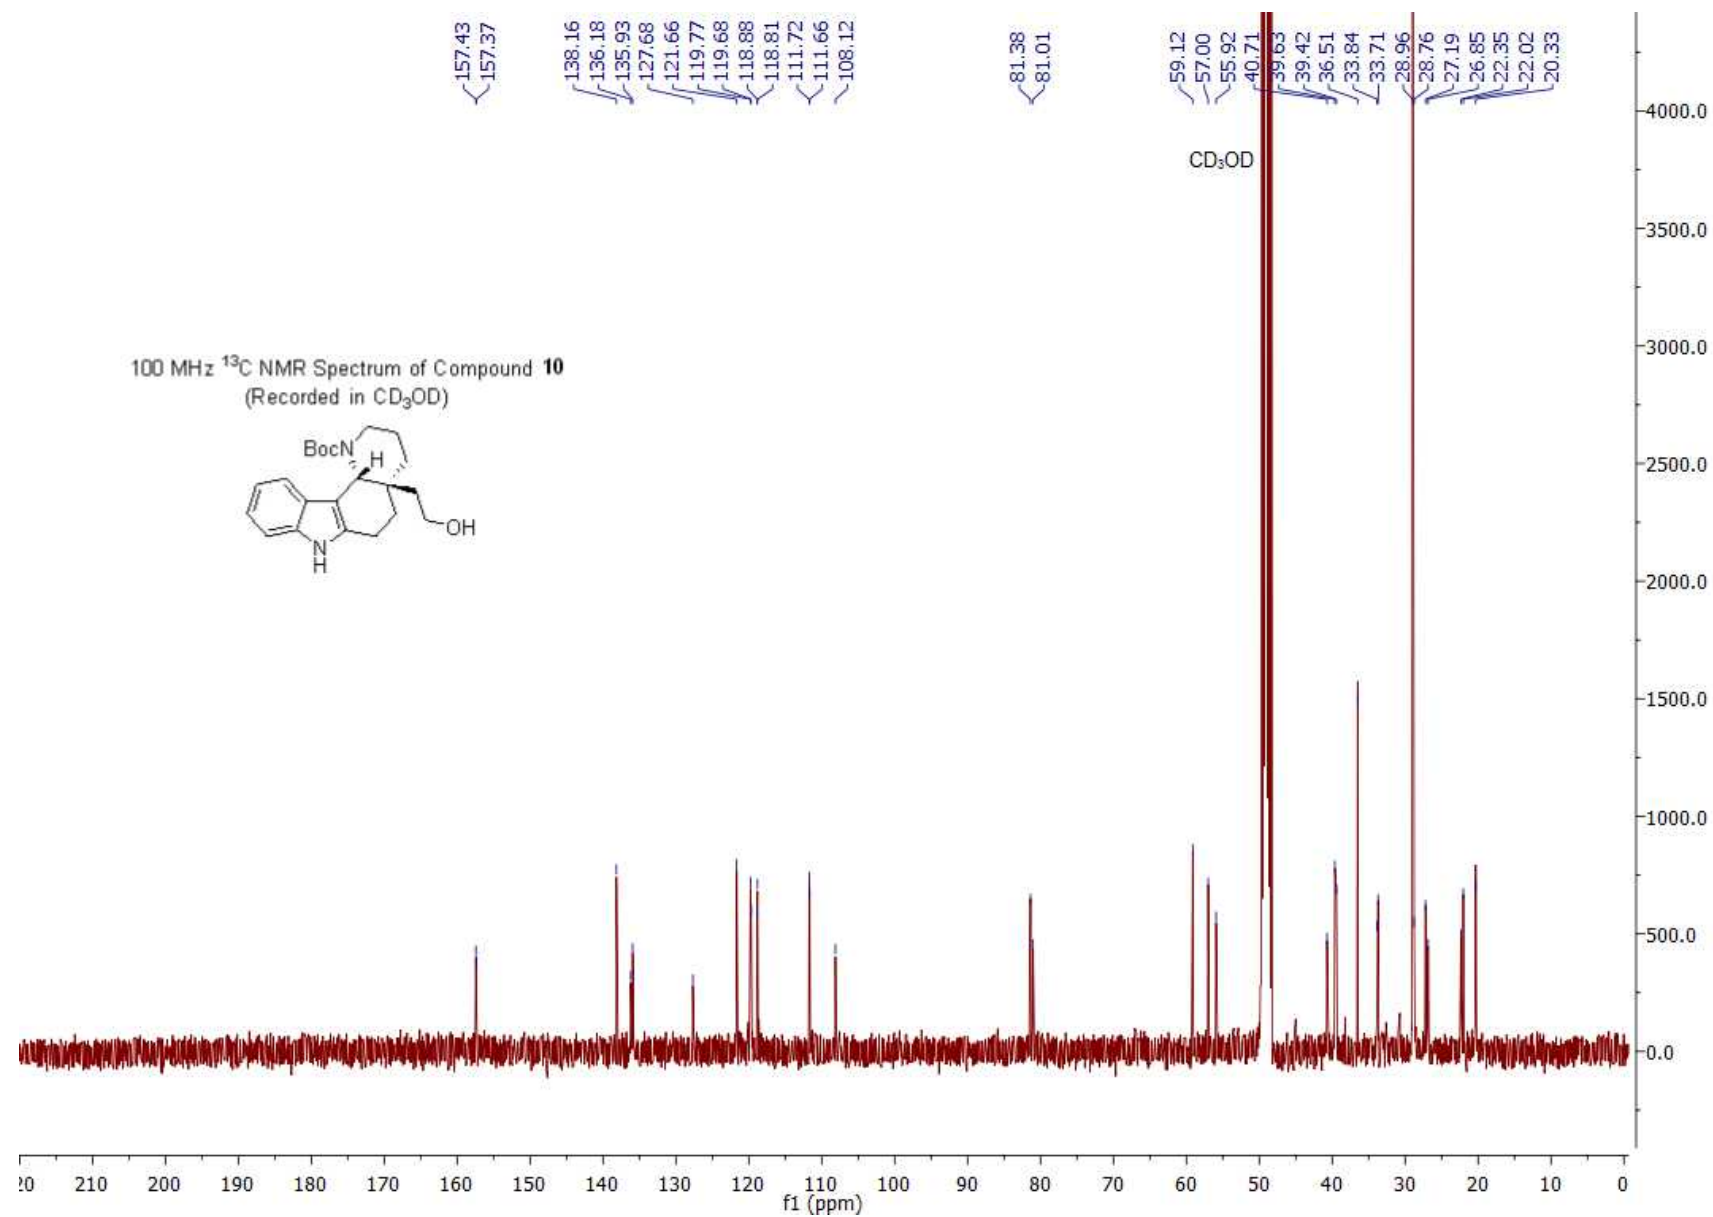

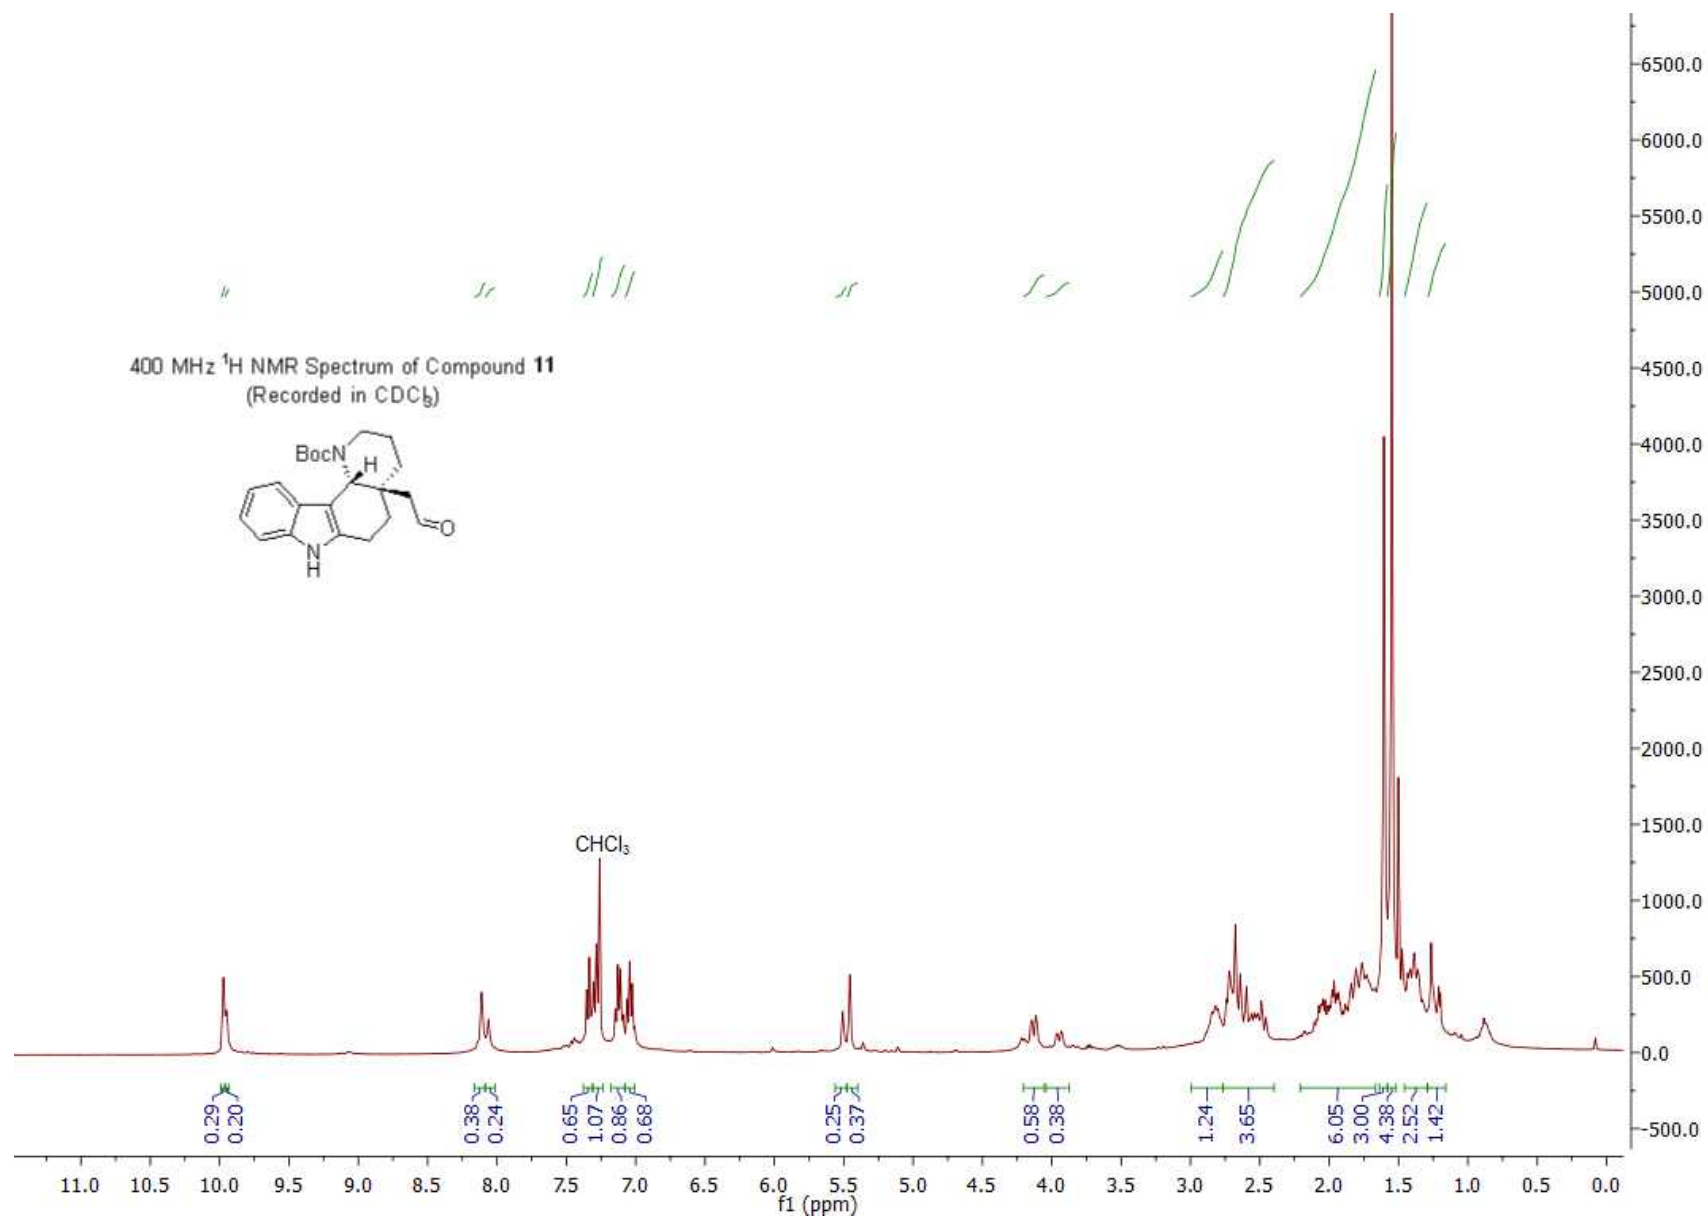

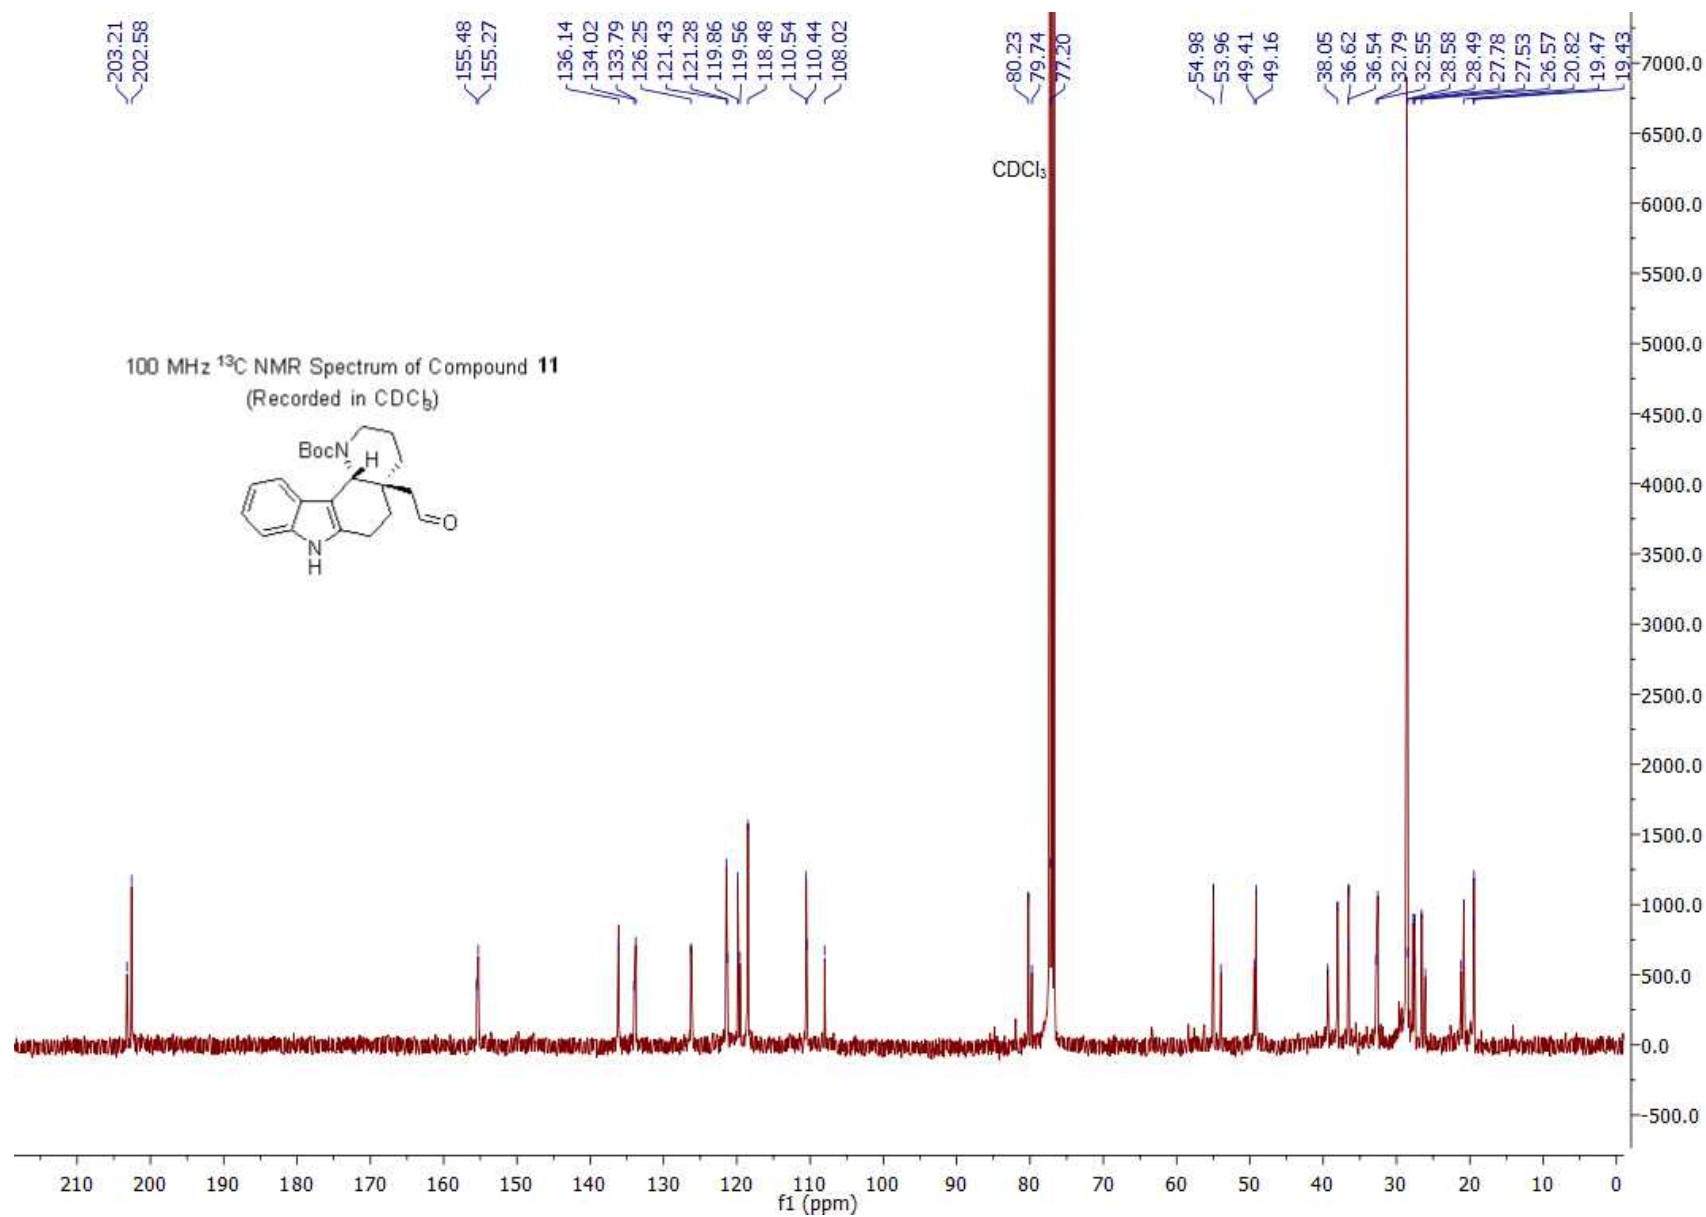



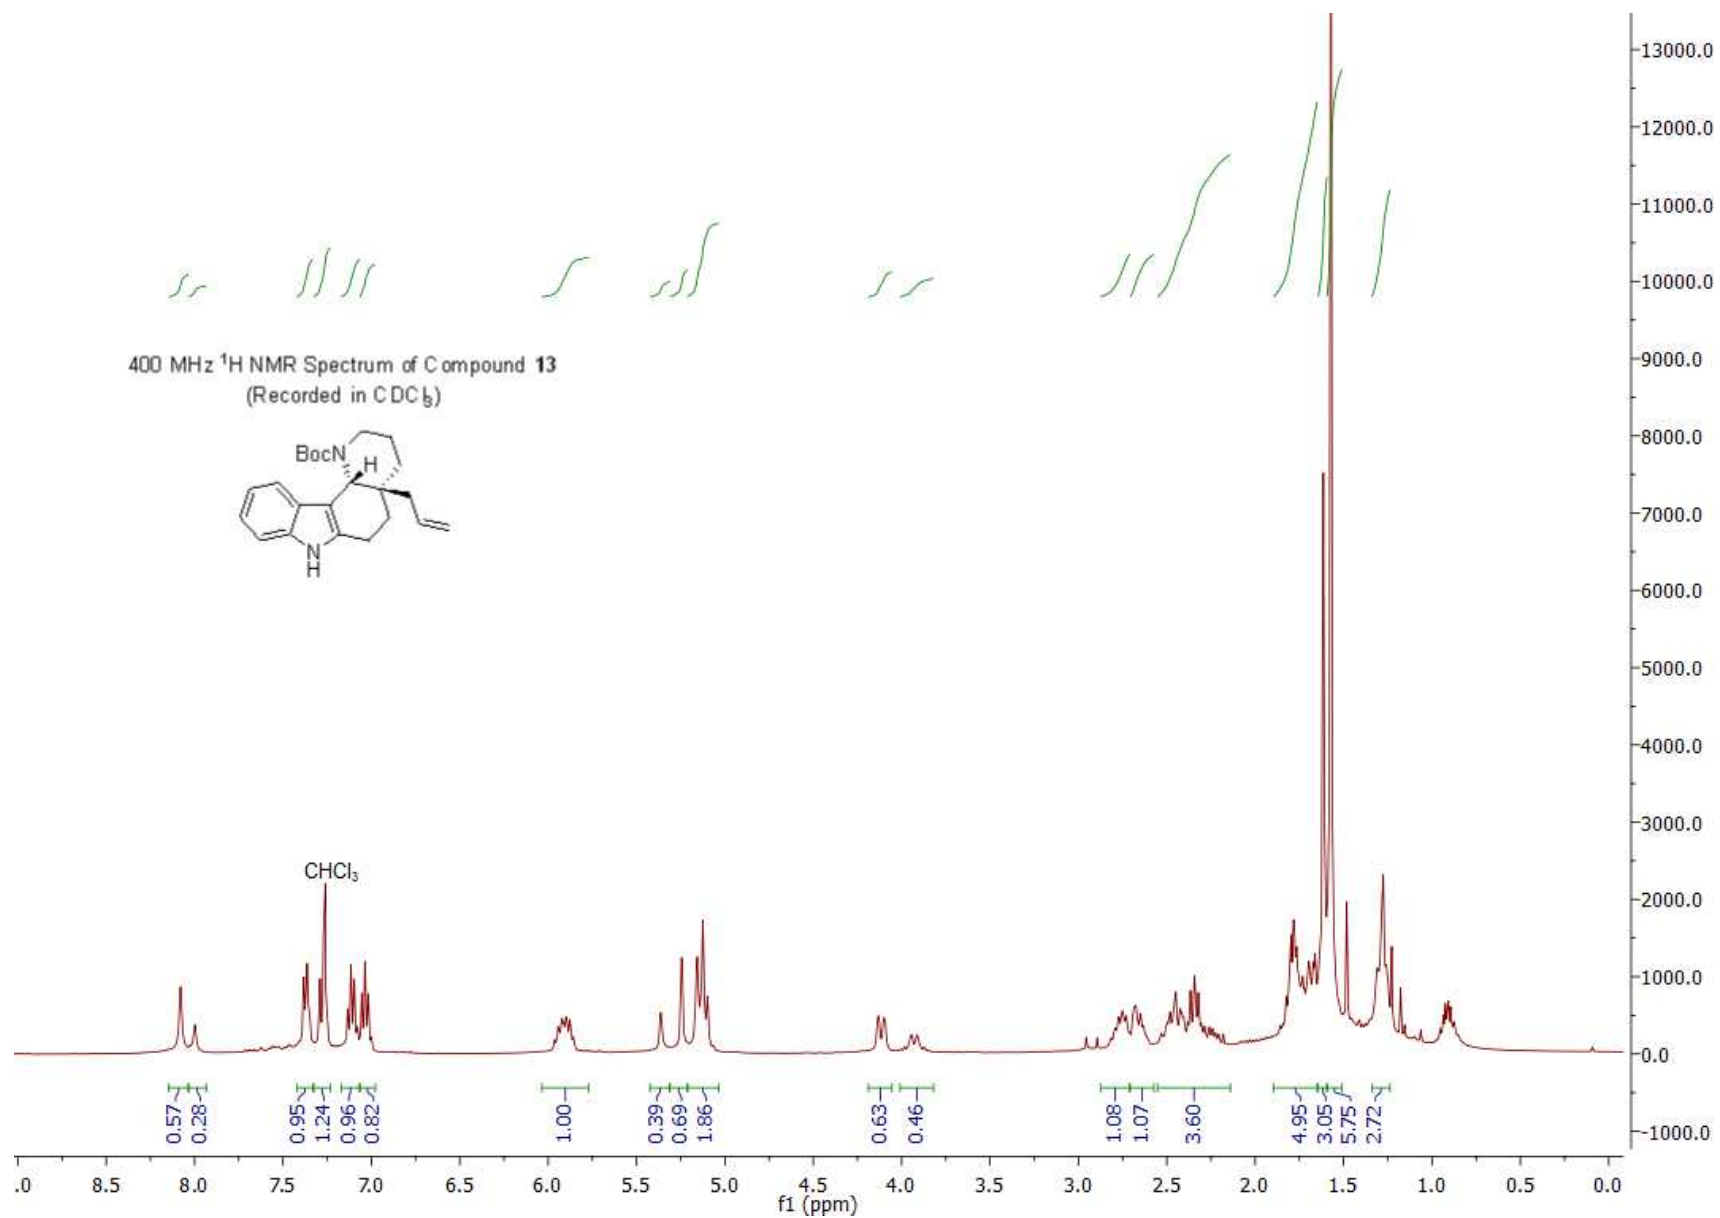

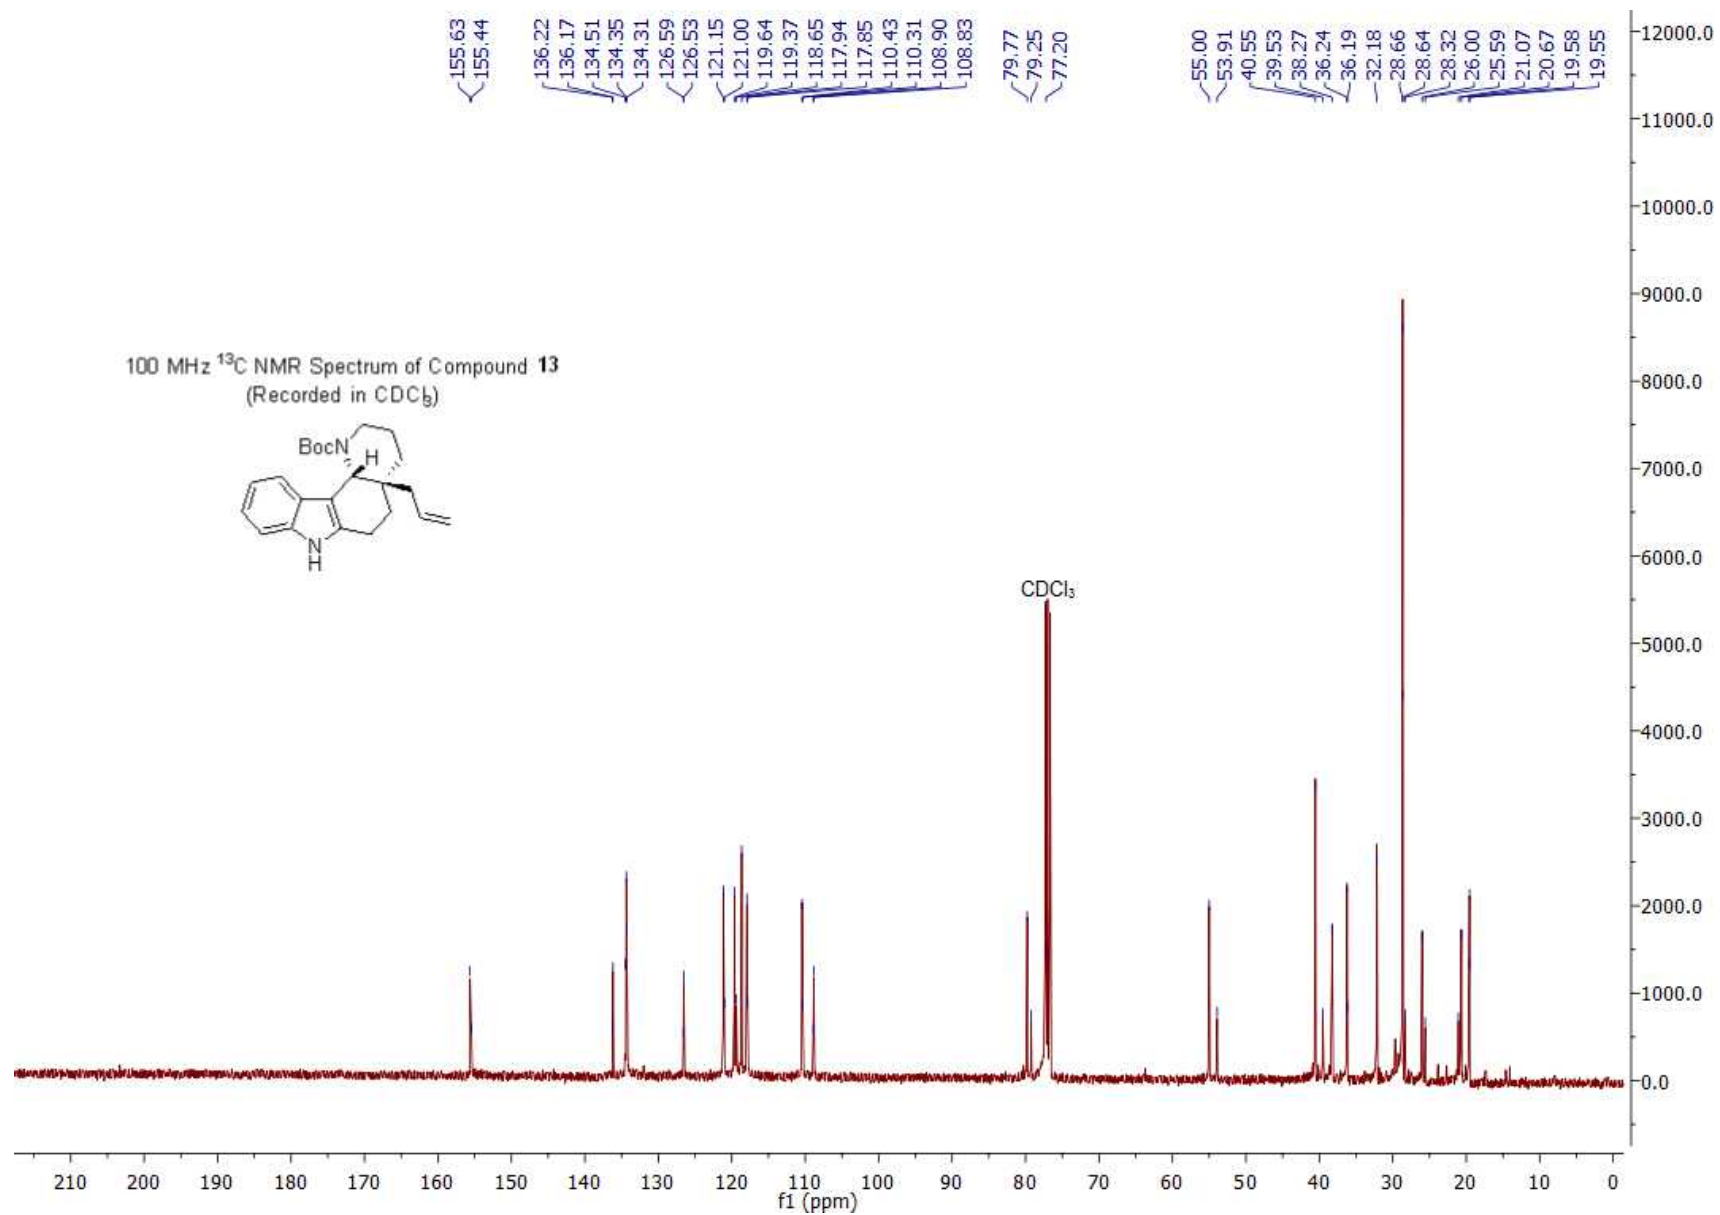

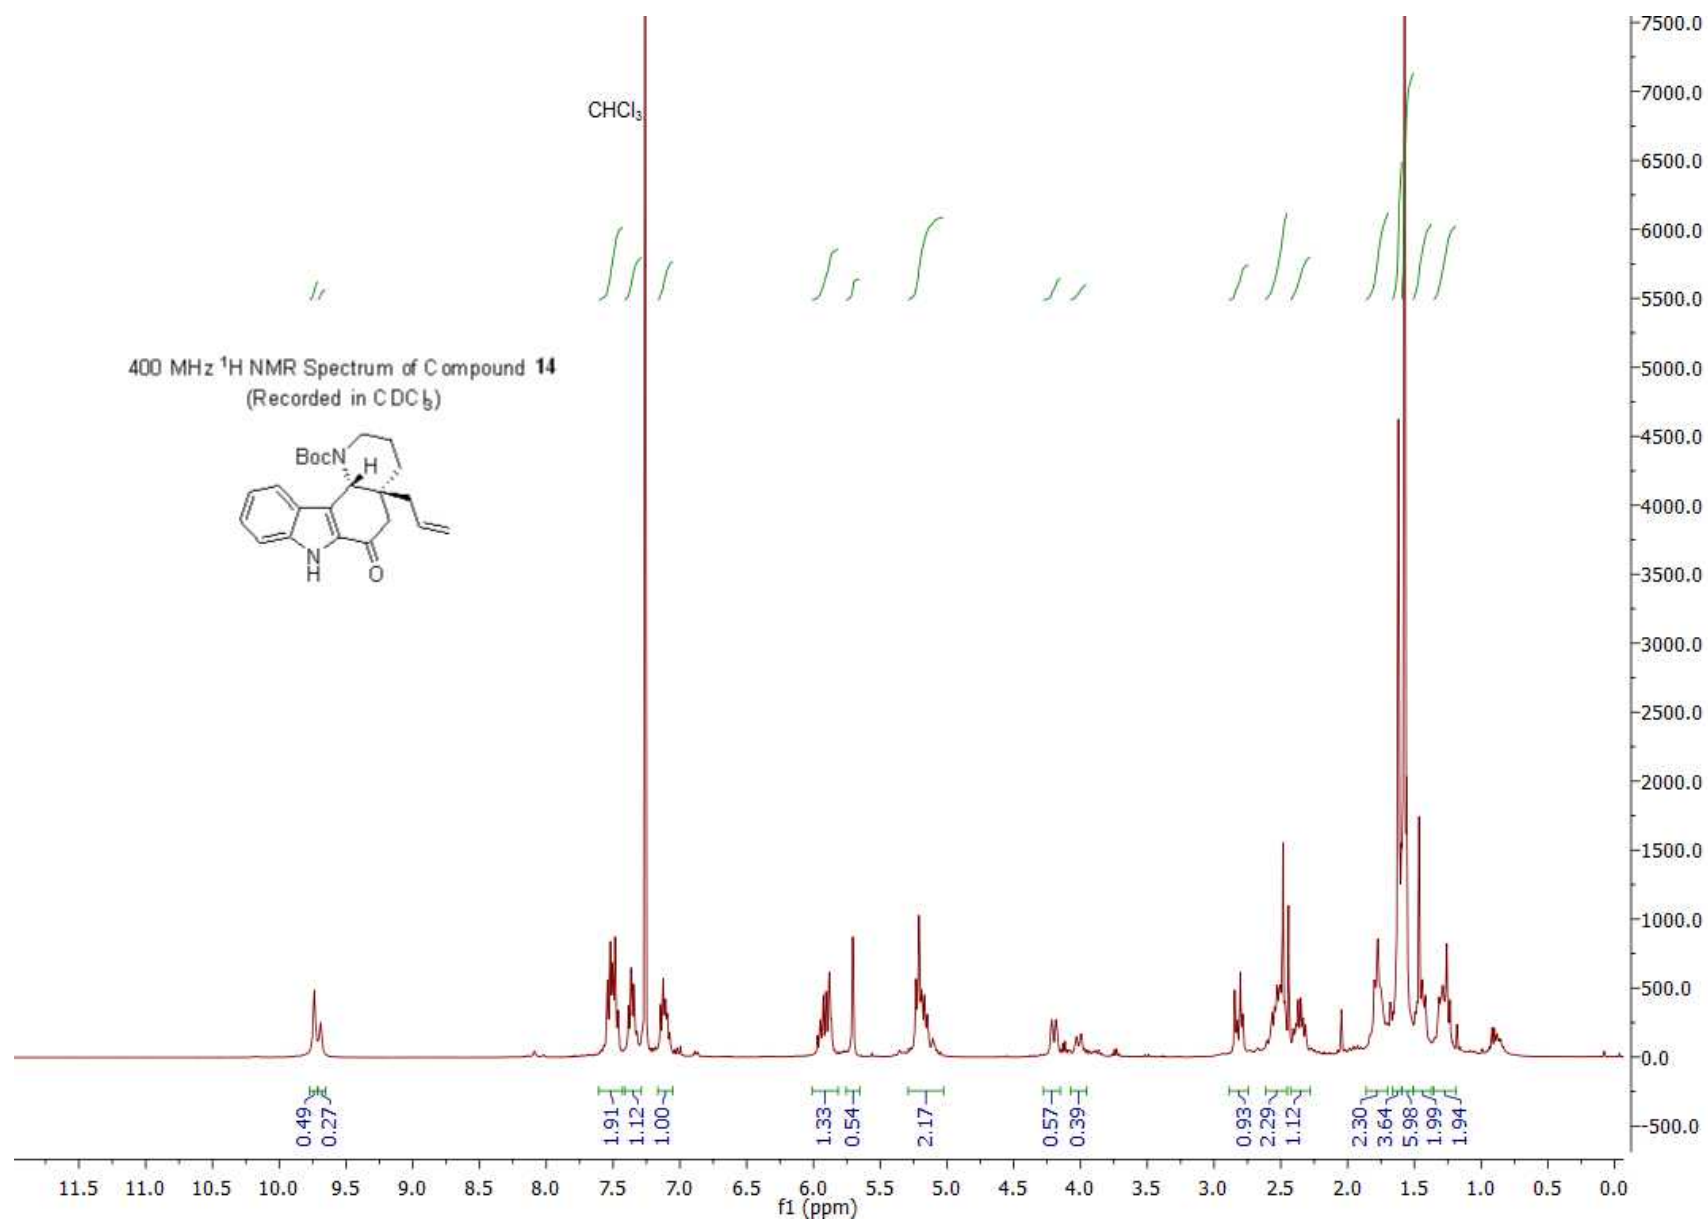

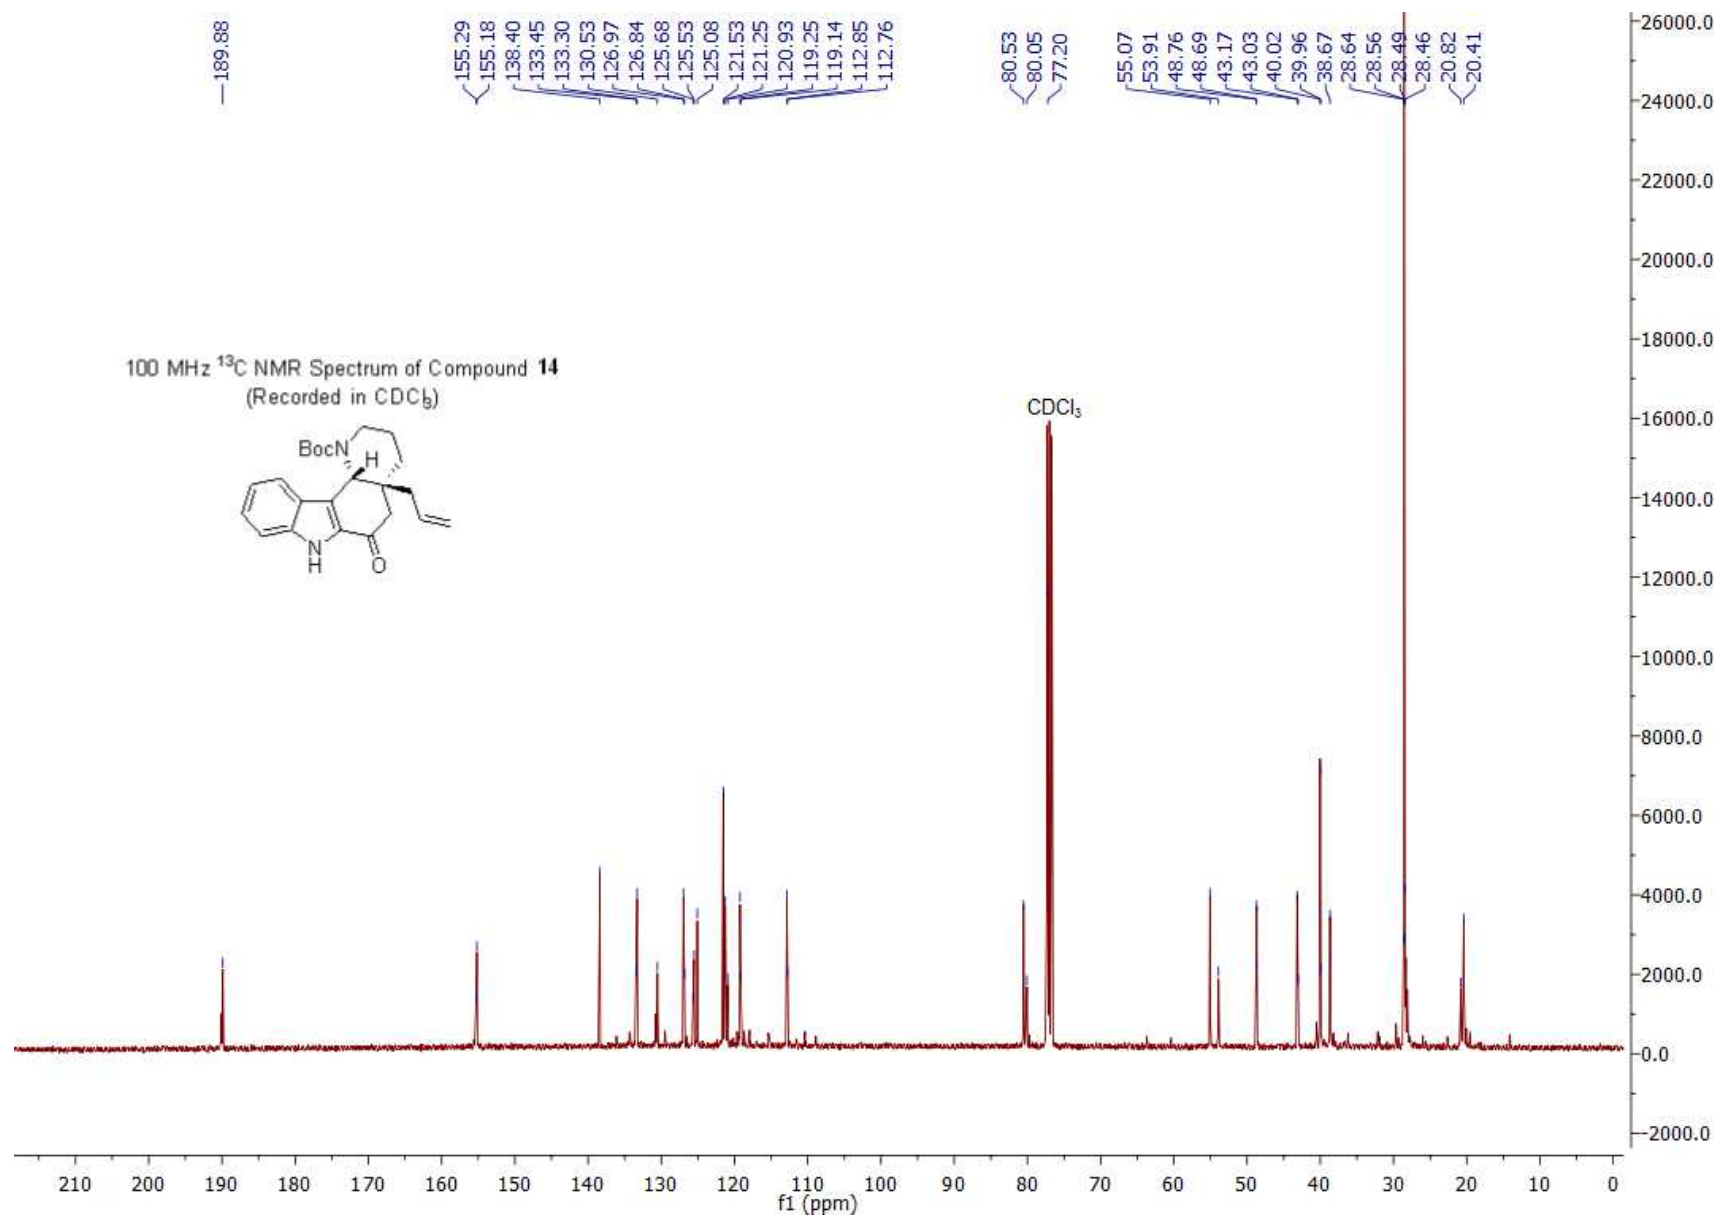

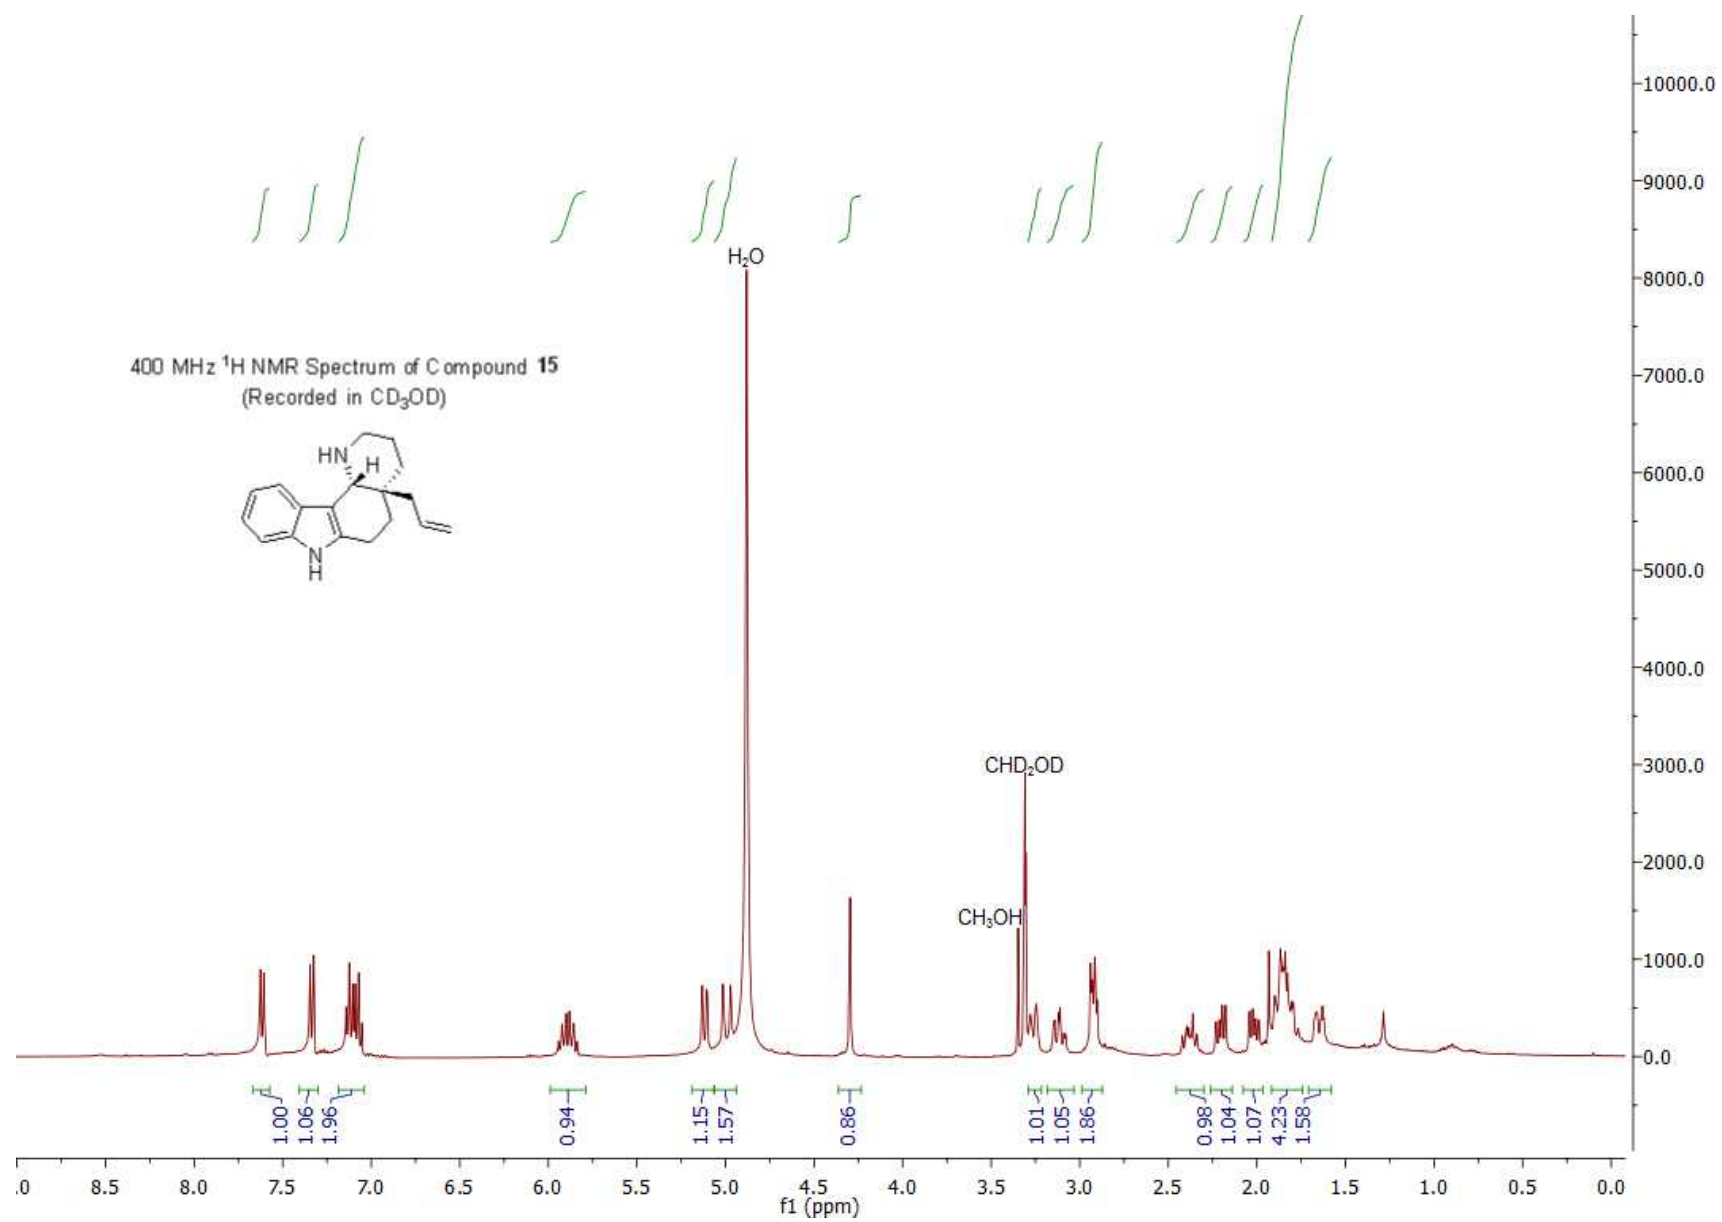

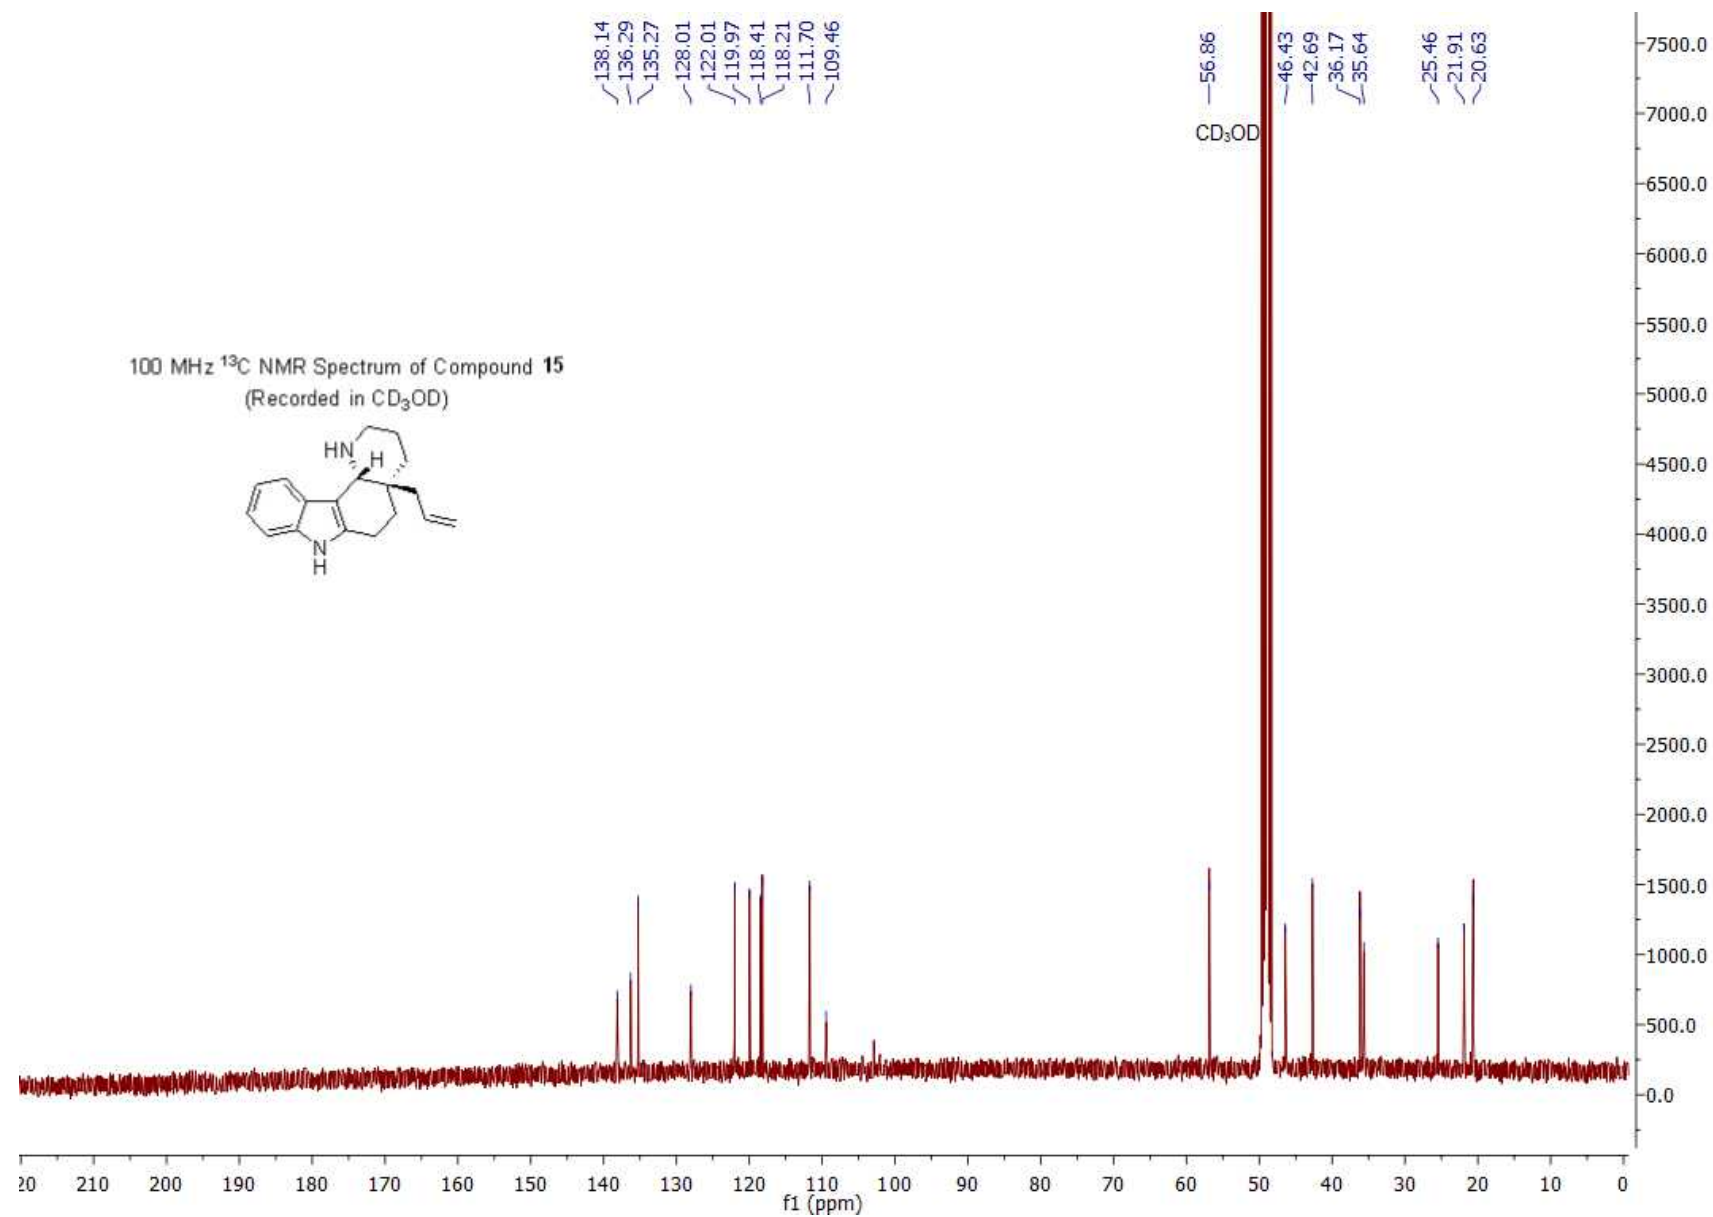

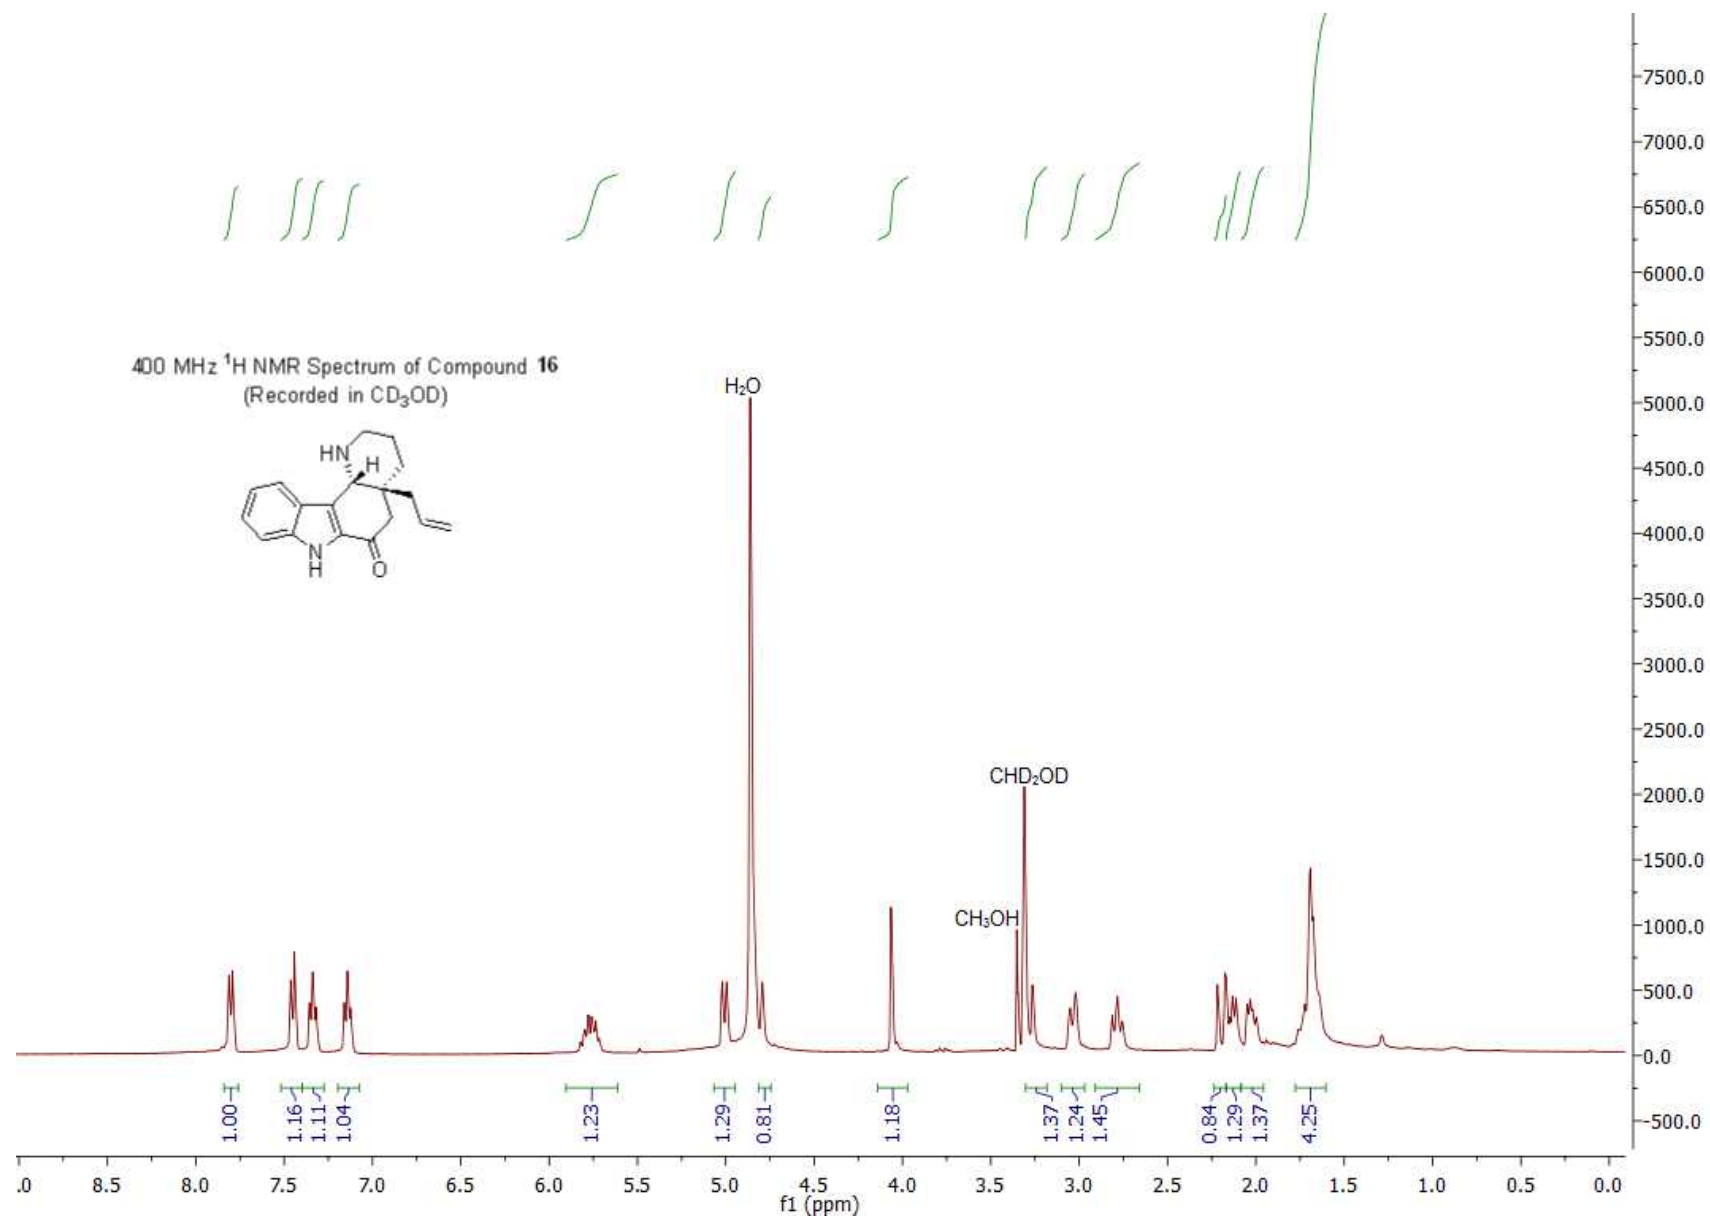

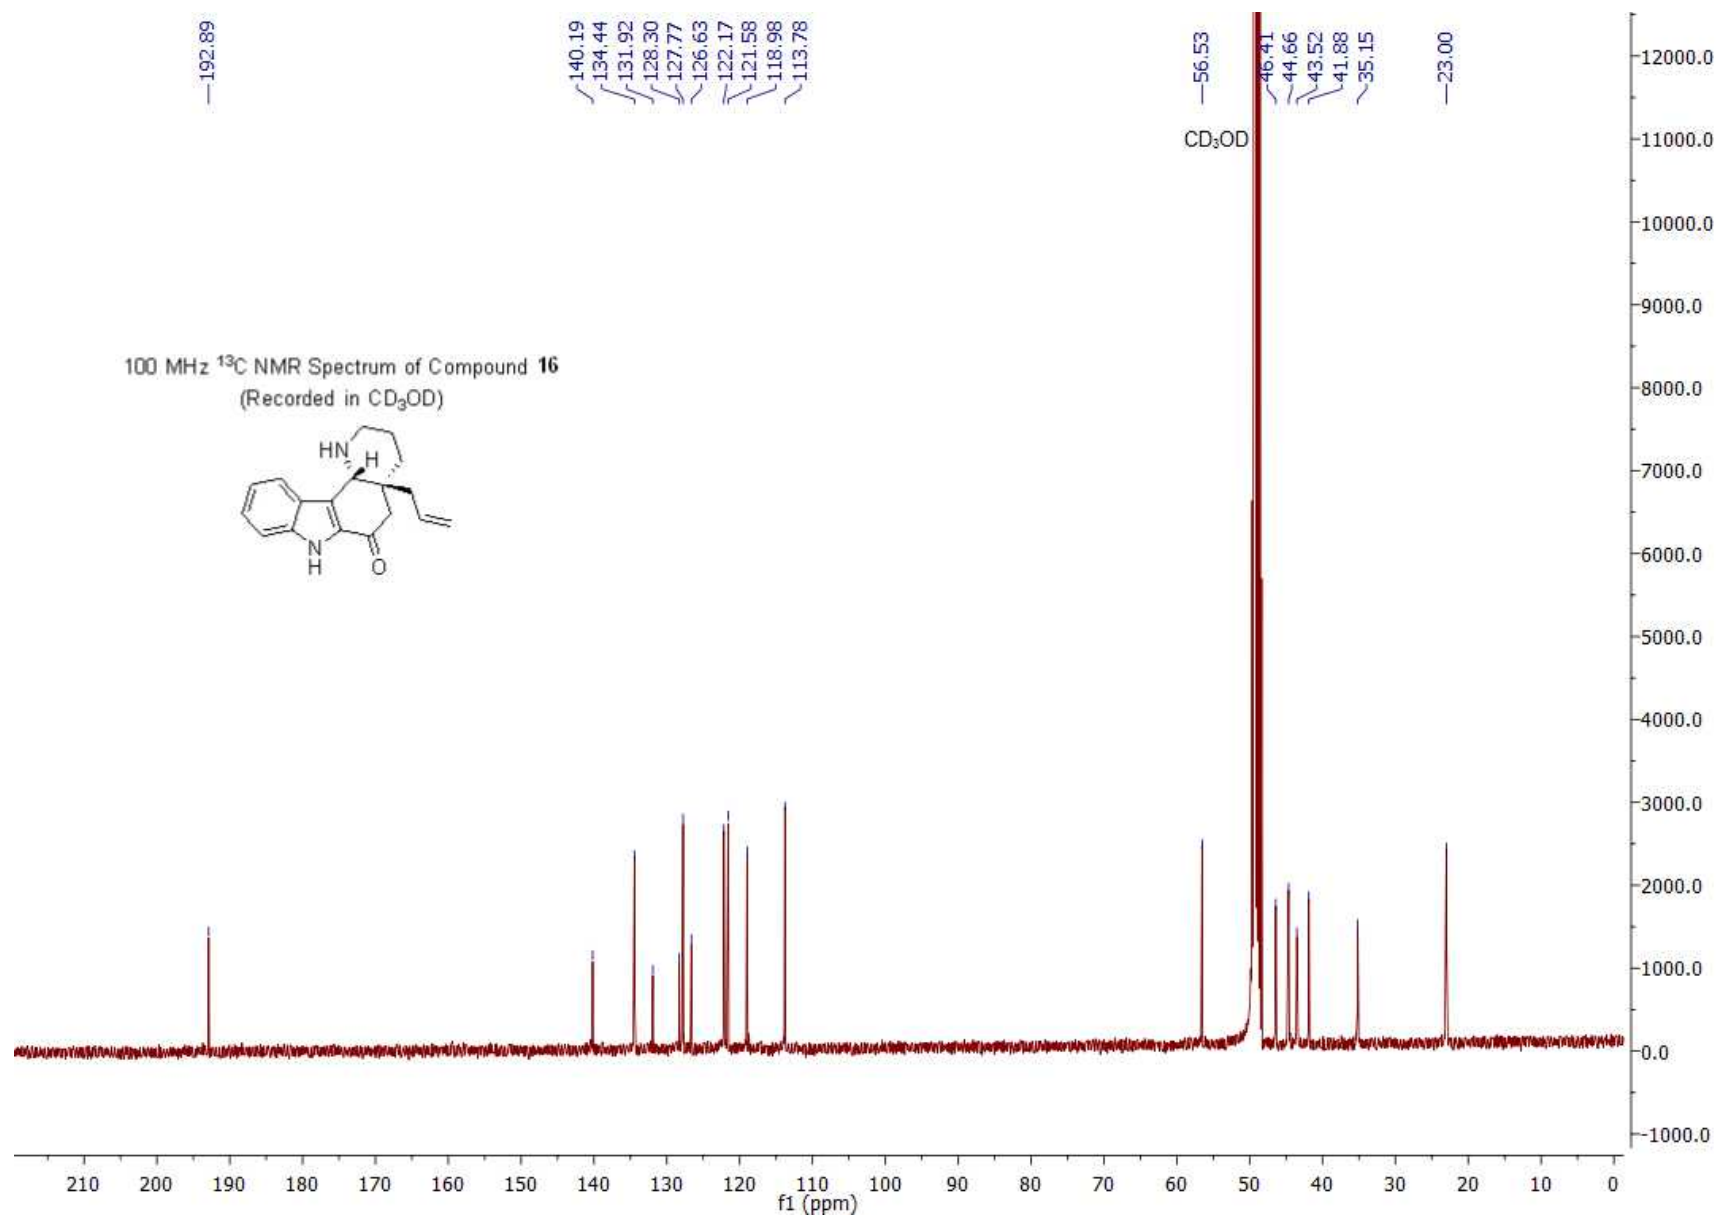



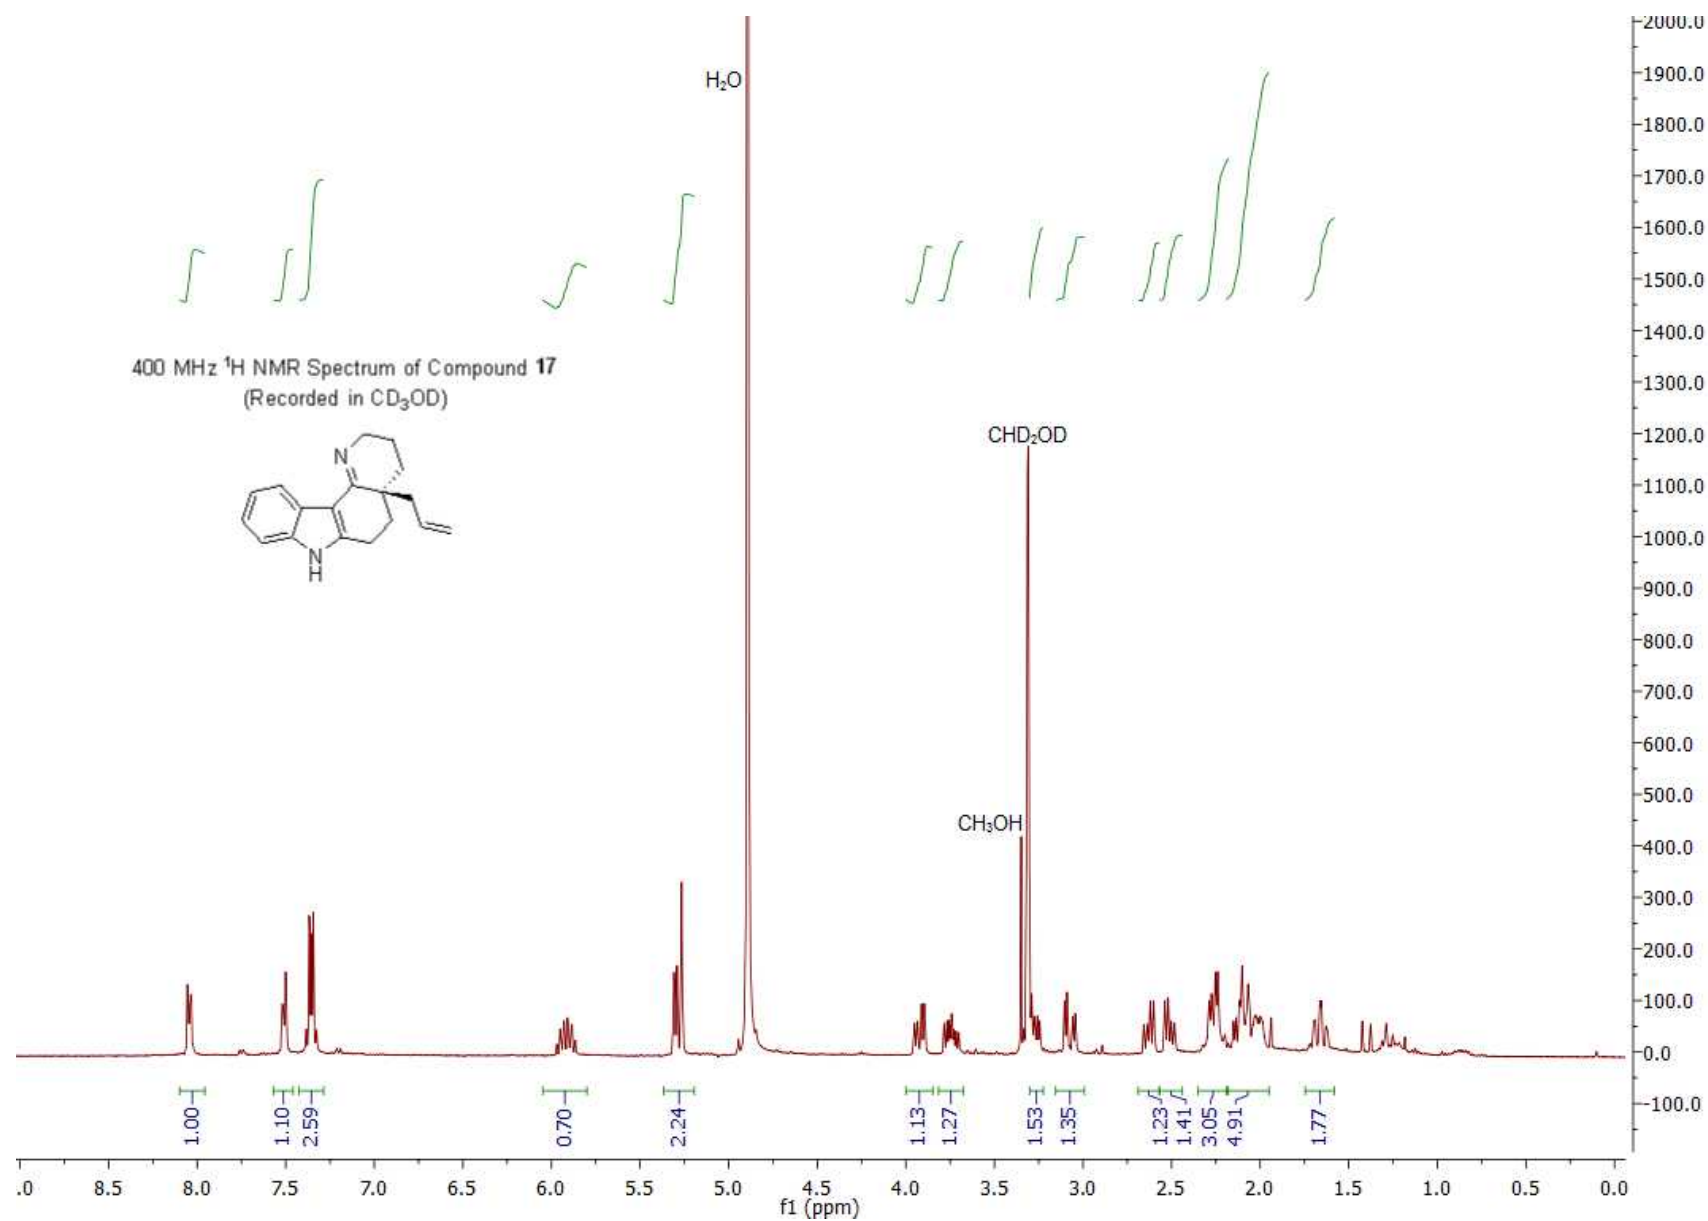

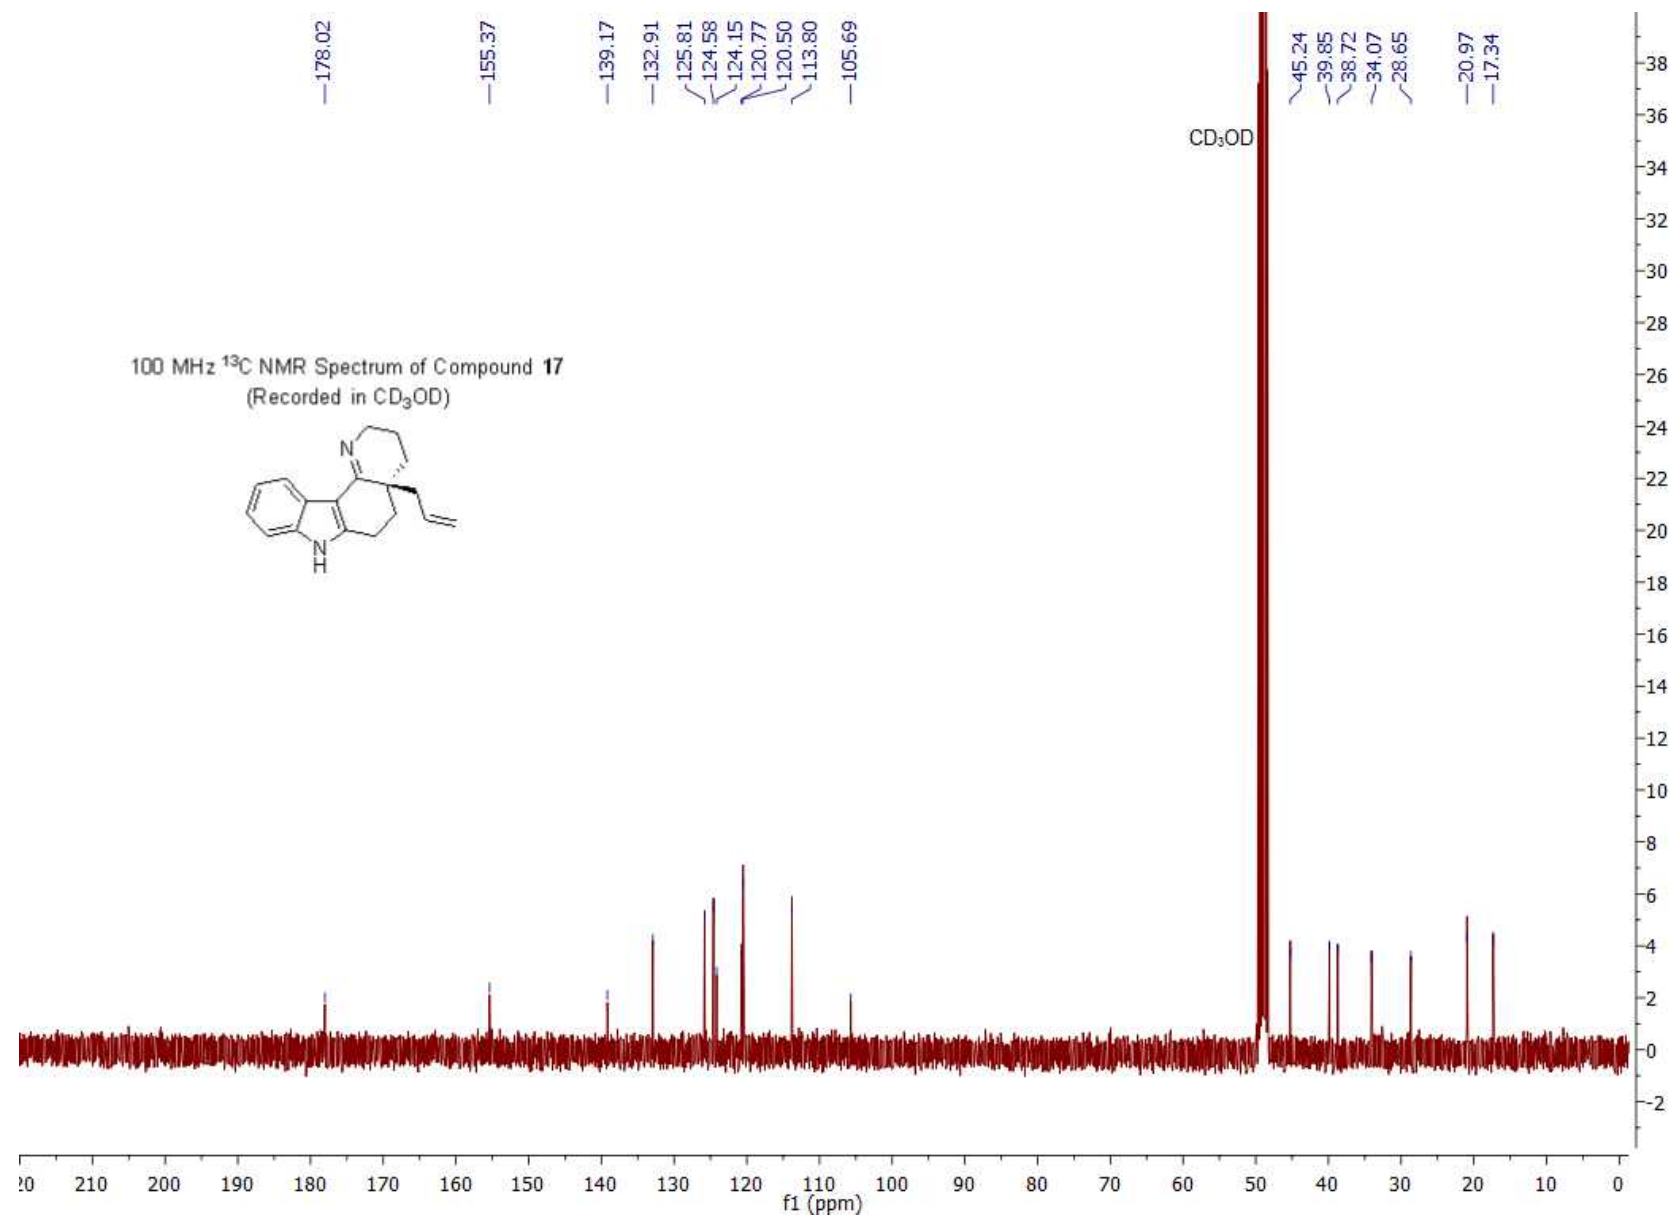

ST206.50.fid

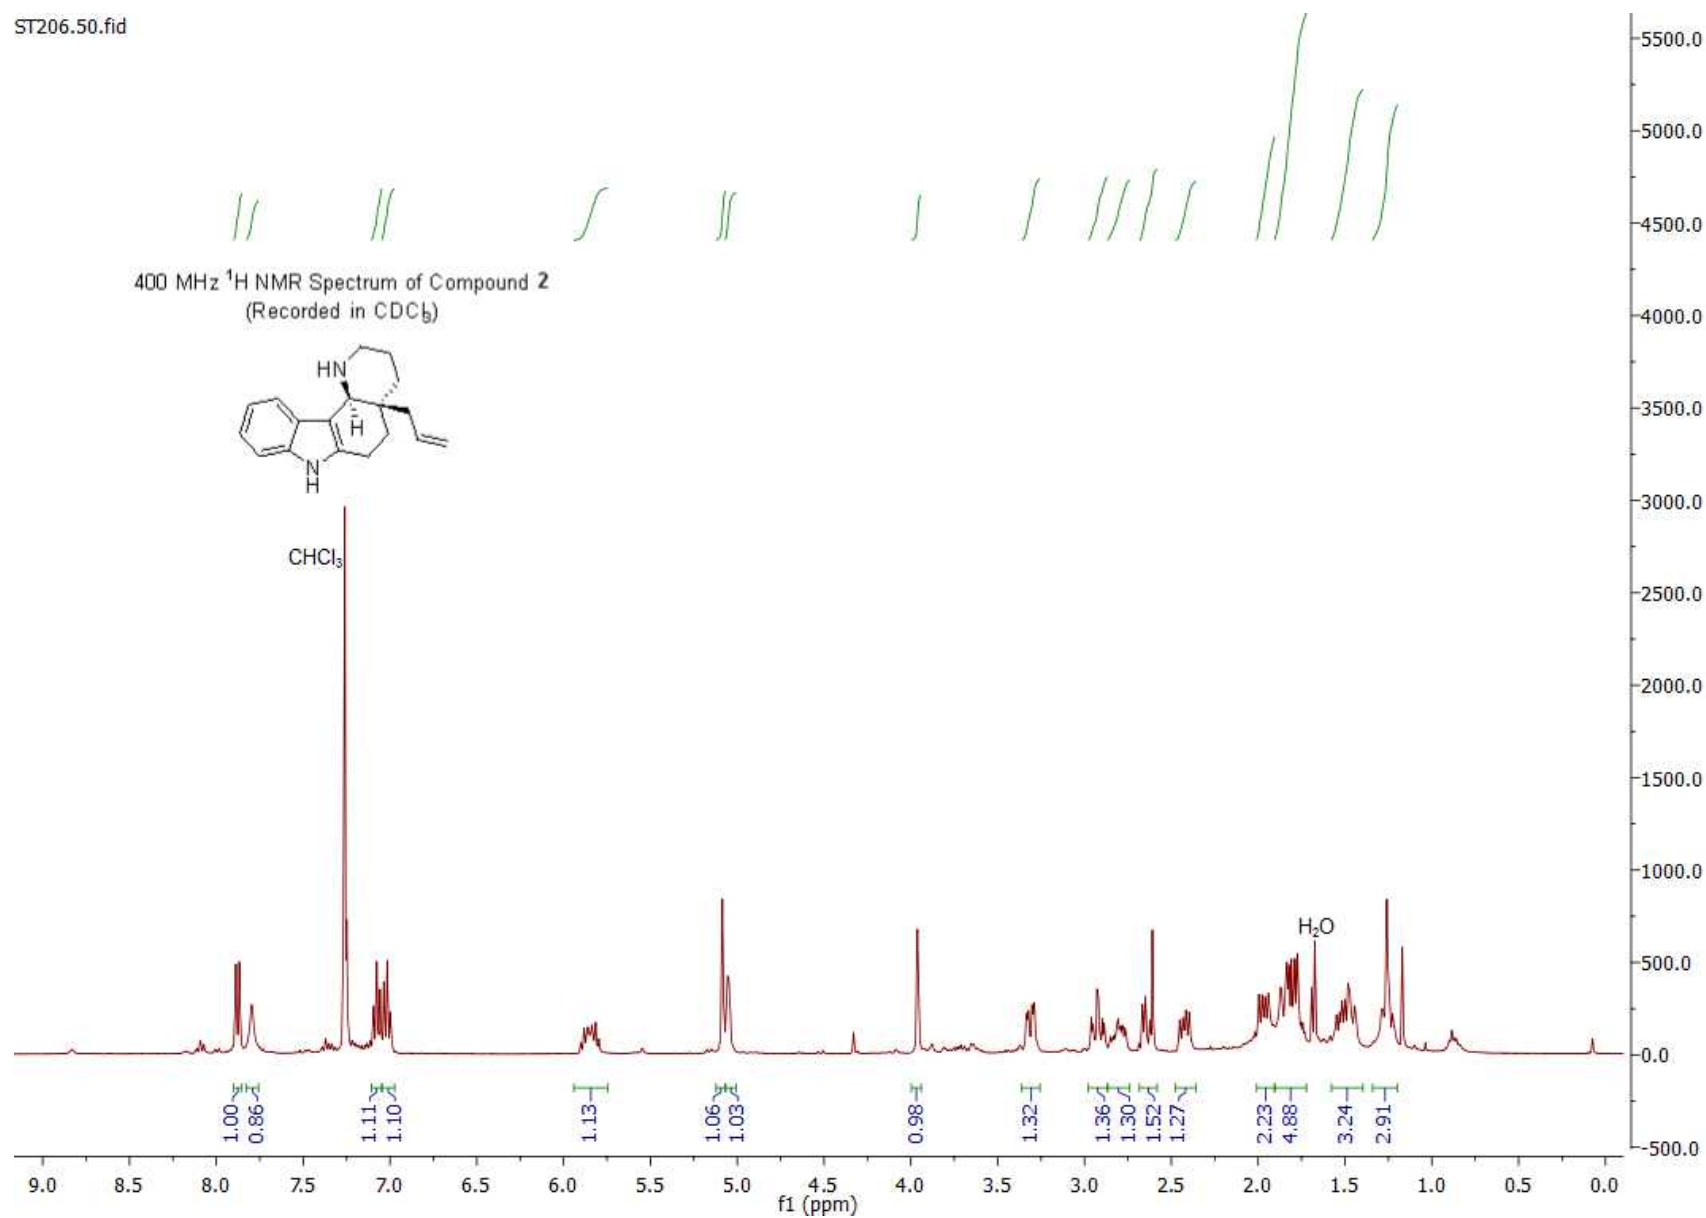

ST206.31.fid

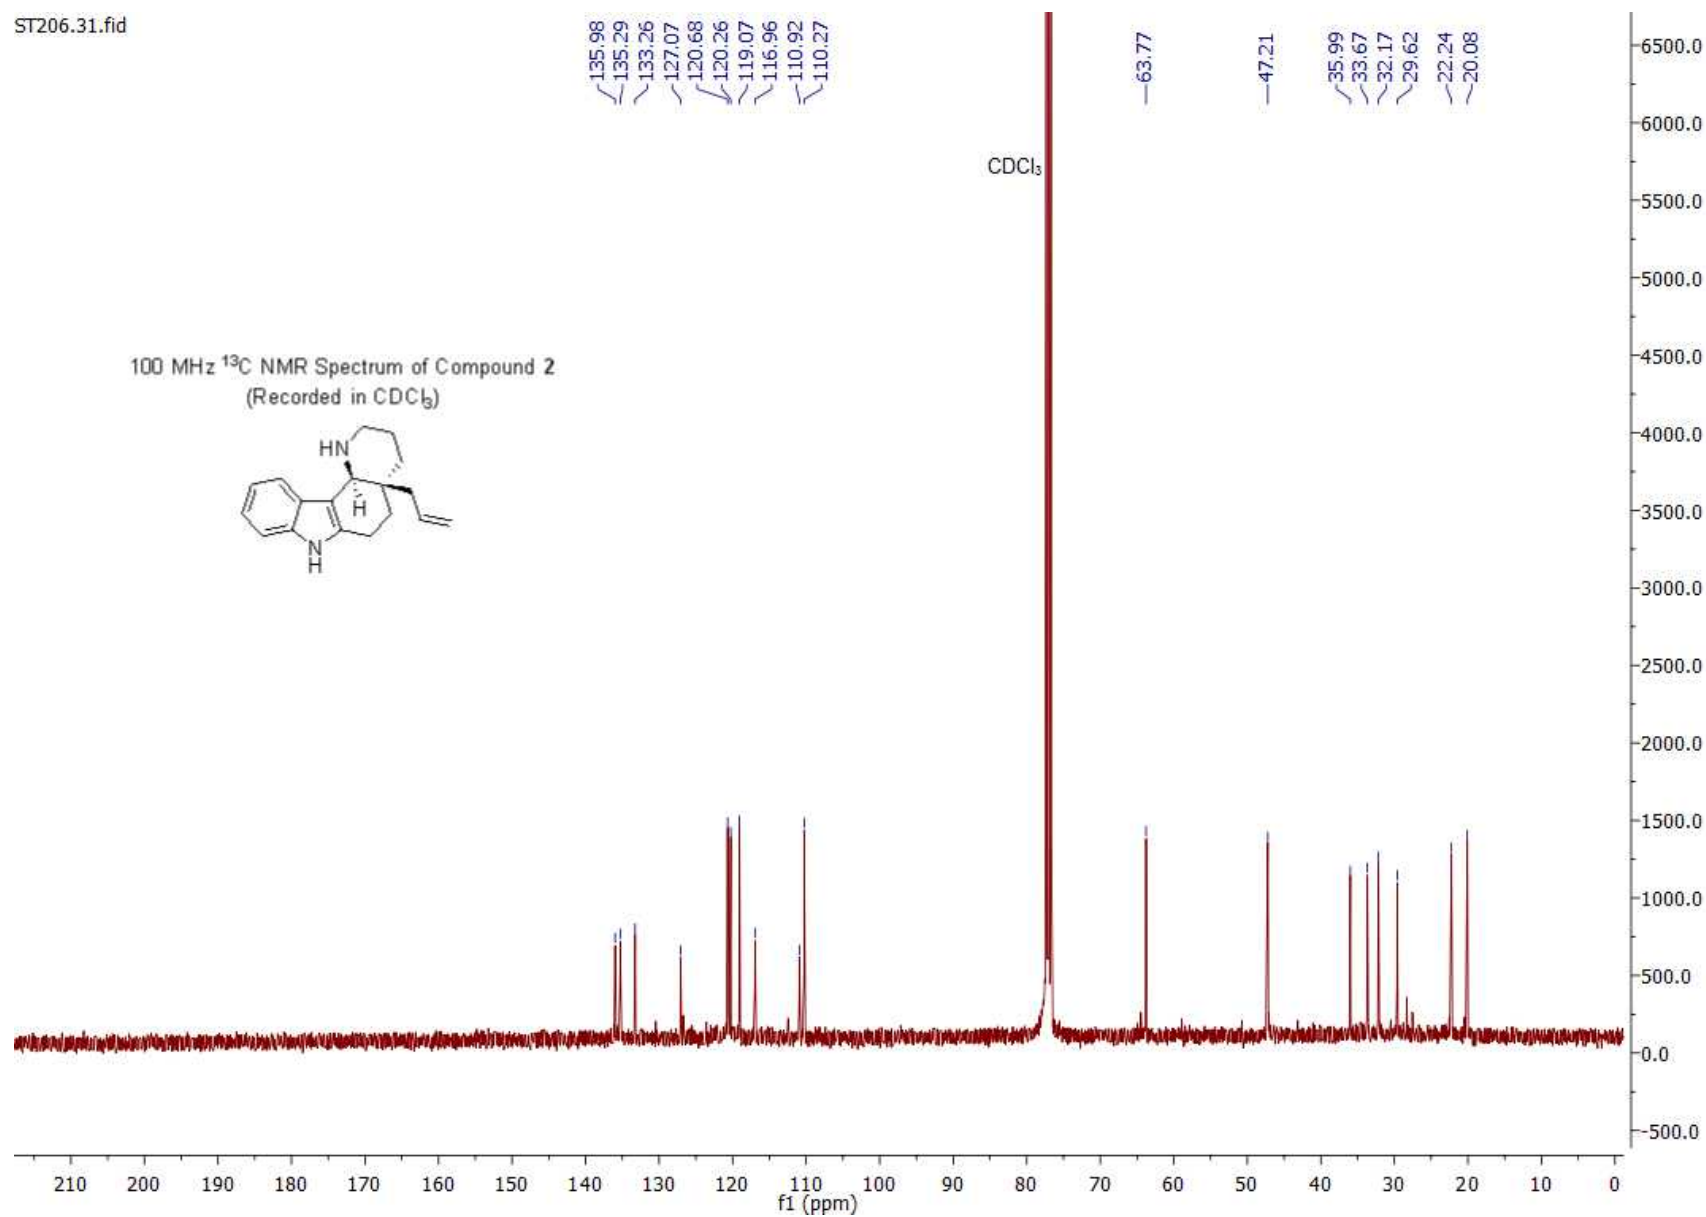

**Table 1:** *Comparison of  $^{13}\text{C}$  NMR Data Recorded for Compound 2 Obtained by the Route Associated with the Present Study with those Reported by Mukai<sup>6</sup>*

| $^{13}\text{C}$ NMR Data for<br>Compound <b>2</b><br>( $\delta_{\text{C}}$ ) <sup>a</sup> | $^{13}\text{C}$ NMR Data<br>from Mukai<br>( $\delta_{\text{C}}$ ) <sup>b</sup> |
|-------------------------------------------------------------------------------------------|--------------------------------------------------------------------------------|
| 136.0                                                                                     | 135.9                                                                          |
| 135.3                                                                                     | 135.3                                                                          |
| 133.3                                                                                     | 133.3                                                                          |
| 127.1                                                                                     | 127.1                                                                          |
| 120.7                                                                                     | 120.6                                                                          |
| 120.3                                                                                     | 120.2                                                                          |
| 119.1                                                                                     | 119.0                                                                          |
| 117.0                                                                                     | 117.0                                                                          |
| 110.9                                                                                     | 110.9                                                                          |
| 110.3                                                                                     | 110.3                                                                          |
| 63.8                                                                                      | 63.7                                                                           |
| 47.2                                                                                      | 47.2                                                                           |
| 36.0                                                                                      | 35.9                                                                           |
| 33.7                                                                                      | 33.6                                                                           |
| 32.2                                                                                      | 32.1                                                                           |
| 29.6                                                                                      | 29.6                                                                           |
| 22.2                                                                                      | 22.2                                                                           |
| 20.1                                                                                      | 20.0                                                                           |

<sup>a</sup>spectrum recorded in  $\text{CDCl}_3$  at 100 MHz;

<sup>b</sup>data obtained from reference 6, spectrum recorded in  $\text{CDCl}_3$  at 100 MHz.
